# Supplementary material for: Total synthesis of eryvarin H and its derivatives and their biological activity as ERRγ inverse agonist
Source: Royal Society of Chemistry journal article supplement (doi:10.1039/c3ob41264d), 2013-01-01

## <Supporting Information>

# Total Synthesis of Eryvarin H and its Derivatives and their Biological Activity as ERR $\gamma$ Inverse Agonist

Ja Young Koo,<sup>1</sup> Sangmi Oh,<sup>2</sup> Seung-Lye Cho,<sup>3</sup> Minseob Koh,<sup>1</sup> Won-Keun Oh,<sup>4</sup> Hueng-Sik Choi,<sup>\*,3</sup>, Seung Bum Park<sup>\*,1,5</sup>

1. Department of Chemistry, Seoul National University, Seoul 151-747, Korea
2. Medicinal Chemistry Team, Institut Pasteur Korea, Seongnam-si, Gyeonggi-do, Korea
3. National Creative Research Initiatives Center for Nuclear Receptor Signals, Hormone Research Center, School of Biological Sciences and Technology, Chonnam National University, Gwangju 500-757, Korea
4. College of Pharmacy, Seoul National University, Seoul 151-742, Korea
5. Department of Biophysics and Chemical Biology, Seoul National University, Seoul 151-747, Korea

\* To whom correspondence should be addressed.

For S. B. Park : [sbpark@snu.ac.kr](mailto:sbpark@snu.ac.kr). For H.-S. Choi : [hsc@chonnam.ac.kr](mailto:hsc@chonnam.ac.kr).

| S. No. | Content                                                                 | Page No. |
|--------|-------------------------------------------------------------------------|----------|
| I      | Supporting Figure                                                       | S2       |
| II     | Procedures for biological studies                                       | S3       |
| III    | Synthetic procedures and characterization of Compound <b>1–19</b>       | S4–S12   |
| IV     | <sup>1</sup> H and <sup>13</sup> C-NMR spectra for compound <b>1–19</b> | S13–S31  |

## I. Supporting Figure

### Amino acids in 2 Å range from Eryvarin H

|        |        |        |        |        |        |        |
|--------|--------|--------|--------|--------|--------|--------|
| CYS269 | ALA272 | ASP273 | GLU275 | TRP305 | LEU309 | TYR326 |
| LEU342 | LEU345 | HIS434 | PHE435 | LEU440 | GLU441 |        |

### Amino acids in 2 Å range from GSK5182

|        |        |        |        |        |        |        |
|--------|--------|--------|--------|--------|--------|--------|
| CYS269 | ALA272 |        | GLU275 |        | LEU309 | TYR326 |
| LEU342 | LEU345 | HIS434 | PHE435 | LEU440 | GLU441 |        |

### Amino acids in 4 Å range from Eryvarin H

|        |        |        |        |        |        |        |
|--------|--------|--------|--------|--------|--------|--------|
| LEU265 | LEU268 | CYS269 | ASP270 | LEU271 | ALA272 | ASP273 |
| ARG274 | GLU275 | LEU276 | TRP305 | MET306 | LEU309 | ILE310 |
| VAL313 | ARG316 | TYR326 | MET332 | LEU342 | LEU345 | ASN346 |
| ILE349 | ALA431 | HIS434 | PHE435 | ILE438 | LEU440 | GLU441 |
| MET446 | LEU449 |        |        |        |        |        |

### Amino acids in 4 Å range from GSK5182

|        |        |        |        |        |        |        |
|--------|--------|--------|--------|--------|--------|--------|
| LEU265 | LEU268 | CYS269 |        | LEU271 | ALA272 | ASP273 |
|        | GLU275 | LEU276 | TRP305 | MET306 | LEU309 | ILE310 |
| VAL313 | ARG316 | TYR326 | MET332 | LEU342 | LEU345 | ASN346 |
| ILE349 | ALA431 | HIS434 | PHE435 | ILE438 | LEU440 | GLU441 |
| MET446 | LEU449 |        |        |        |        |        |

Fig. S1. List of interacting amino acids with Eryvarin H and GSK5182, in the range of 2 Å and 4 Å. These diagrams were obtained from Discovery Studio Version 1.5 based on docked ligands to ERRγ.

## II. Procedures for biological studies

**Cell-based Reporter Gene Assay.** The HEK-293T cells were seeded into 24-well plates at a density of  $2.0\text{--}8.0 \times 10^4$  cells/well 24 h prior to the transfection. The cells were transiently transfected with pFR(5xGal4 binding site)-Luc, pCMX-Gal4-ERR $\gamma$ , ER $\alpha$ , mCAR, HNF $\alpha$ , SF-1 and pCMV- $\beta$ -gal for the ERR  $\gamma$  reporter gene assay. Transient transfection was performed using SuperFect (Qiagen, Hilden, Germany) according to the manufacturer's instructions. The cells were treated with 100nM E2(estradiol), 10 $\mu$ M GSK5182, 10 $\mu$ M prepared compounds (**1**, **8–19**) for the final 24 h. The cells then were harvested 48h after transfection, and luciferase activity was measured. Luciferase activity was normalized to  $\beta$ -galactosidase activity. The data is representative of at least three to five independent experiments.

### III. Synthetic Procedures of Compound **1–19**.

#### General information

The  $^1\text{H}$  and  $^{13}\text{C}$  NMR spectra were recorded on a Bruker DRX-300 [Bruker Biospin, Germany], Varian DD2MR400 and Varian Inova-500 [Varian Assoc., USA]. NMR chemical shifts were measured in ppm downfield from internal tetramethylsilane (TMS) standard or specific solvent signal. Structure diversity of natural product collection was supported from the Korea Bioactive Natural Material Bank (KBNMB). Multiplicity was indicated as follows: s (singlet), d (doublet), t (triplet), q (quartet), m (multiplet), dd (doublet of doublet), td (triplet of doublet), etc. Coupling constants were reported in Hz. Low resolution mass spectrometry (LRMS) analyses were performed with Finnigan MSQ Plus Surveyor HPLC/MS system [Thermo Electron Corp., USA] using electron spray ionization (ESI). The HRMS analyses were conducted at the national center for inter-university research facilities (NCRF) in Seoul National University by direct injection on JEOL JMS AX505WA spectrometer using fast atom bombardment (FAB) method. All reagents in this synthetic procedure were purchased from Sigma-Aldrich [MO, USA], TCI [Japan] and Alfa Aesar [USA]. The progress of reaction was monitored using thin-layer chromatography (TLC) (silica gel 60 F254 0.25 mm), and components were visualized by observation under UV light (254 and 365 nm) or by treating the TLC plates with anisaldehyde or phosphomolybdic acid followed by heating. Silica gel 60 (0.040–0.063 mm) used in flash column chromatography was purchased from Merck [Germany]. All reactions were conducted in oven-dried glassware under dry argon atmosphere, unless otherwise specified. All solvents and organic reagents were purchased from commercial vendors and used without further purification unless otherwise mentioned.

Compound **1**, **Eryvarin H**, 3-(4-hydroxy-2,5-dimethoxyphenyl)-2H-chromen-7-ol

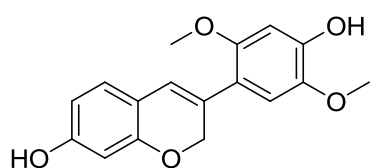

Compound **2a** (0.100 mmol), one of boronic acids/boronic esters (2 equiv.),  $\text{Pd}(\text{PPh}_3)_4$  (5 mol %),  $\text{Na}_2\text{CO}_3$  (3 equiv.) were suspended in a solvent mixture of Toluene/EtOH/ $\text{H}_2\text{O}$  (2:1:1, total volume of 4 mL). The reaction mixture was stirred at 80 °C for 4 h and the completion of the reaction was monitored by TLC. When the starting material **2a** was all consumed, the resulting mixture was diluted with ethyl acetate and washed with brine. The combined organic layer was dried over anhydrous  $\text{MgSO}_4$ , then filtered, and concentrated under reduced pressure. After a short silica-gel filtration, the resulting product was used directly for the next reaction without further purification. The solution of previous prepared compound in HF/pyridine/THF (1:1:18, volumetric ratio, total volume of 3 mL) was stirred for 5 h at room temperature in a plastic vessel. After the reaction completion, Additional fluoride source was quenched with excess  $\text{TMSOEt}$  (6 mL). The mixture was evaporated under reduced pressure, the resultant was purified directly with silica gel flash column chromatography (EtOAc:hexane = 1:4 to EtOAc:hexane = 1:3) to provide the desired product,

compound **1**.

Yield: 73% (2-step yield),  $R_f$  = 0.04 (1:6 = EtOAc:hexane, v/v);  $^1\text{H}$  NMR (500 MHz,  $\text{CDCl}_3$ )  $\delta$  6.93 (d, 1H,  $J$  = 8.0 Hz), 6.83 (s, 1H), 6.56 (s, 1H), 6.49 (s, 1H), 6.39–6.41 (m, 2H), 4.98 (d, 2H,  $J$  = 1.0 Hz), 3.88 (s, 3H), 3.75 (s, 3H);  $^{13}\text{C}$  NMR (75 MHz,  $\text{DMSO}-d_6$ )  $\delta$  158.2, 154.1, 151.6, 147.5, 141.6, 127.8, 127.5, 120.4, 117.1, 115.3, 113.0, 108.7, 102.4, 101.0, 67.7, 56.5, 55.9; HRMS ( $\text{FAB}^+$ )  $m/z$  calcd for  $\text{C}_{17}\text{H}_{16}\text{O}_5$   $[\text{M}]^+$  300.0998, found 300.0996.

Compound **2a**, (3-bromo-2H-chromen-7-yloxy)(*tert*-butyl)dimethylsilane

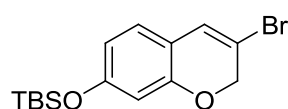

The mixture of **5** (3 mmol, 1 equiv.) and imidazole (1.5 equiv.) was stirred in anhydrous DCM (20 mL) for 15 min at room temperature. To the solution was added TBSCl (1.1 equiv.) and the reaction mixture was stirred for 1 h at room temperature. Then the solution was extracted with excess ethyl acetate and washed with saturated  $\text{NH}_4\text{Cl}$  aqueous solution and brine. The organic layer was dried over anhydrous  $\text{MgSO}_4$  and filtered. Then, the filtrate was condensed under reduced pressure. The resulting product was used directly for the next reaction without further purification. To a solution of resulting compound (1 equiv.) in EtOH (20 mL), sodium borohydride ( $\text{NaBH}_4$ , 1.2 equiv.) was added at room temperature and the reaction mixture was stirred for 1 h at room temperature. After the completion of reaction monitored by TLC, the resulting mixture was diluted with deionized water and quenched by aqueous  $\text{NH}_4\text{Cl}$  solution, and extracted three times with ethyl acetate. The combined organic layer was washed with brine once, then dried over anhydrous  $\text{MgSO}_4$ , filtered, and concentrated under reduced pressure. The resulting compound is  $\alpha$ -bromoalcohol structure 3-bromo-7-(*tert*-butyldimethylsilyloxy)chroman-4-ol as a diastereomeric mixture. To a solution of previous  $\alpha$ -bromoalcohol structure (1 equiv.) in anhydrous toluene, *p*-toluenesulfonic acid monohydrate (*p*-TSA, 0.1 equiv.) was added and the reaction mixture was heated in capped microwave vessel under microwave irradiation (80 °C, 120 W) for 20 min. After the reaction completion monitored by TLC, the resulting mixture was diluted with ethyl acetate and washed with brine. The combined organic layer was dried over anhydrous  $\text{MgSO}_4$ , filtered, and concentrated under reduced pressure. The desired product **2a** was obtained by the purification using silica-gel flash column chromatography (only hexane to EtOAc:hexane = 1:50).

Yield: 61% (3-step yield),  $R_f$  = 0.43 (Only hexane);  $^1\text{H}$  NMR (500 MHz,  $\text{CDCl}_3$ )  $\delta$  6.78 (d, 1H,  $J$  = 8.0 Hz), 6.68 (s, 1H), 6.37 (dd, 1H,  $J$  = 2.3, 8.3 Hz), 6.31 (dd, 1H,  $J$  = 0.5, 2.5 Hz), 4.83 (d, 2H,  $J$  = 1.5 Hz), 0.96 (s, 9H), 0.19 (s, 6H);  $^{13}\text{C}$  NMR (125 MHz, acetone- $d_6$ )  $\delta$  158.0, 154.3, 128.1, 126.8, 117.4, 114.6, 112.7, 108.7, 70.8, 26.2, 19.0, -4.1; HRMS ( $\text{FAB}^+$ )  $m/z$  calcd for  $\text{C}_{15}\text{H}_{21}\text{BrO}_2\text{Si}$   $[\text{M}]^+$  340.0494, found 340.0489.

Also, **2a** was obtained from  $\alpha$ -bromoalcohol structure by thermal dehydration (80 °C for 2 h) with the 3-step yield of 24%. Stability of **2a** was not quite good, thus it should be kept in -20 °C and more stable as a solution in ethyl acetate or hexane.

Compound **2b**, (3-bromo-2,2-dimethyl-2H-chromen-7-yloxy)triisopropylsilane

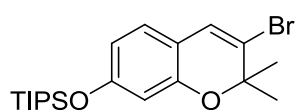

Compound **2b** was previously reported in *Chem. Commun.*, 2006, 2962–2964.  
(Compound **17a** in the reference)

Compound **3**, *tert*-butyl(2,5-dimethoxy-4-(4,4,5,5-tetramethyl-1,3,2-dioxaborolan-2-yl)phenoxy)dimethylsilane

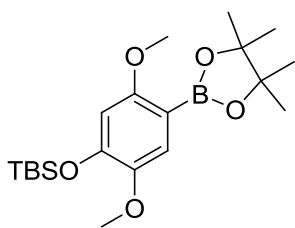

To the solution of starting material **7** (0.300 mmol, 1 equiv.), Pd(OAc)<sub>2</sub> (5 mol %), DPEphos (10 mol %) in 1,4-dioxane (2 mL) was added triethylamine (4 equiv.) and pinacolborane (3 equiv.). The reaction mixture was stirred at 80 °C for 12 h. After the completion of the reaction monitored by TLC, the resulting mixture was diluted with aqueous NH<sub>4</sub>Cl saturated solution, and extracted three times with ethyl acetate. The combined organic layer was washed with brine once, then dried over anhydrous MgSO<sub>4</sub>, filtered, and concentrated under reduced pressure. The desired product **3** was obtained by the purification using silica-gel flash column chromatography (EtOAc:hexane = 1:20 to EtOAc:hexane = 1:4).

Yield: 63%, *R*<sub>f</sub> = 0.47 (1:6 = EtOAc:hexane, v/v); <sup>1</sup>H NMR (500 MHz, CDCl<sub>3</sub>) δ 7.17 (s, 1H), 6.43 (s, 1H), 3.79 (s, 3H), 3.75 (s, 3H), 1.34 (s, 12H), 0.99 (s, 9H), 0.16 (s, 6H); <sup>13</sup>C NMR (125 MHz, CDCl<sub>3</sub>) δ 164.2, 159.9, 149.1, 144.9, 120.5, 105.9, 83.4, 56.8, 56.4, 25.9, 25.0, 18.6, -4.5; HRMS (FAB<sup>+</sup>) *m/z* calcd for C<sub>20</sub>H<sub>35</sub>O<sub>5</sub>SiB [M]<sup>+</sup> 394.2351, found 394.2353.

Compound **4**, 7-hydroxychroman-4-one

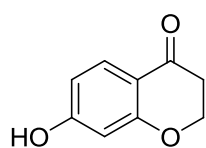

To a mixture of resorcinol (10.0 mmol, 1 equiv.) and 3-chloropropionic acid (1.01 equiv.) was slowly added trifluoromethanesulfonic acid (5 mL). The solution was stirred at 80 °C for 1.5 h, and poured into DCM (100 mL). The solution was poured into deionized water and the aqueous layer was extracted with DCM (100 mL) twice. The combined organic layer was dried over anhydrous MgSO<sub>4</sub>, then filtered, and concentrated under reduced pressure. The resulting product was used directly for the next reaction without further purification, with addition of 2N NaOH (400 mL) aqueous solution was stirred at 0 °C for 4 h. After the reaction was completed, the pH was adjusted to 2 with concentrated HCl by checked with pH paper. The mixture was extracted trice with EtOAc, washed with brine, dried over MgSO<sub>4</sub>, filtered, and concentrated under reduced pressure. The desired product **4** was obtained by recrystallization with EtOAc/hexane (1:5).

Yield: 62% (2-step yield), *R*<sub>f</sub> = 0.41 (1:1 = EtOAc:hexane, v/v); <sup>1</sup>H NMR (500 MHz, acetone-*d*<sub>6</sub>) δ 7.70 (d, 1H, *J* = 9.0 Hz), 6.54 (dd, 1H, *J* = 2.3, 8.8 Hz), 6.37 (d, 1H, *J* = 2.5 Hz), 4.51 (t, 2H, *J* = 6.3 Hz), 2.67 (t, 2H, *J* = 6.5 Hz); <sup>13</sup>C NMR (125 MHz, acetone-*d*<sub>6</sub>) δ 190.2, 164.9, 164.7, 129.6, 115.6, 111.0, 103.4, 68.1, 38.0; HRMS

(FAB<sup>+</sup>) m/z calcd for C<sub>9</sub>H<sub>9</sub>O<sub>3</sub> [M]<sup>+</sup> 165.0552, found 165.0553.

Compound **5**, 3-bromo-7-hydroxychroman-4-one

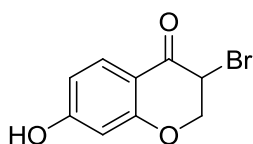

The compound **4** (1.00 mmol, 1.0 equiv.) was dissolved in a mixed solution of ethyl acetate/chloroform/methanol (5:5:1). Copper (II) bromide (CuBr<sub>2</sub>, 2.1 equiv.) was added in this solution and the reaction mixture was heated to reflux (70 °C) for 4 h.

After the completion of the reaction monitored by TLC, the reaction mixture was filter and concentrated *in vacuo*. The resulting residue was dissolved in ethyl acetate and washed 3 times with brine. The combined organic layer was dried over anhydrous MgSO<sub>4</sub>, then filtered, and concentrated under reduced pressure. The desired product **5** was obtained by recrystallization with EtOAc/hexane (1:5).

Yield: 67%, *R*<sub>f</sub> = 0.48 (1:1 = EtOAc:hexane, v/v); <sup>1</sup>H NMR (500 MHz, acetone-*d*<sub>6</sub>) δ 7.76 (d, 2H, *J* = 8.6 Hz), 6.65 (dd, 1H, *J* = 2.3, 8.8 Hz), 6.46 (d, 2H, *J* = 2.0 Hz), 4.75–4.81 (m, 2H), 4.62 (dd, 1H, *J* = 3.5, 13.0 Hz); <sup>13</sup>C NMR (125 MHz, acetone-*d*<sub>6</sub>) δ 184.2, 165.8, 163.6, 130.8, 112.2, 103.4, 72.5, 46.9, 46.9; HRMS (FAB<sup>+</sup>) m/z calcd for C<sub>9</sub>H<sub>7</sub>BrO<sub>3</sub> [M]<sup>+</sup> 241.9579, found 241.9576.

Compound **6**, 4-bromo-2,5-dimethoxybenzaldehyde

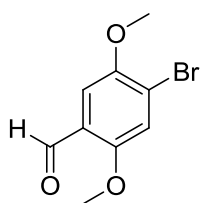

To a solution of 2,5-dimethoxybenzaldehyde (6.00 mmol) in glacial acetic acid (10 mL) was added bromine (1.1 equiv.). The reaction mixture was stirred at room temperature for 12 h. Dilution with ice water was poured into reaction mixture, and then the yellow precipitate was collected by filtration. The mono-brominated desired product **6** was obtained by recrystallization with ethanol.

Yield: 62%, *R*<sub>f</sub> = 0.56 (1:6 = EtOAc:hexane, v/v); <sup>1</sup>H NMR (500 MHz, CDCl<sub>3</sub>) δ 10.40 (s, 1H), 7.34 (s, 1H), 7.25 (s, 1H), 3.90 (s, 3H), 3.90 (s, 3H); <sup>13</sup>C NMR (125 MHz, CDCl<sub>3</sub>) δ 188.8, 156.4, 150.7, 124.4, 120.5, 117.9, 109.9, 56.9, 56.6; HRMS (FAB<sup>+</sup>) m/z calcd for C<sub>9</sub>H<sub>10</sub>BrO<sub>3</sub> [M]<sup>+</sup> 244.9813, found 244.9819.

Compound **7**, (4-bromo-2,5-dimethoxyphenoxy)(tert-butyl)dimethylsilane

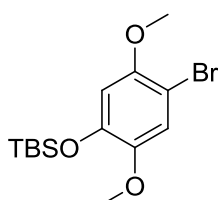

To a solution of compound **6** (1.530 mmol, 1 equiv.) and *meta*-chloroperbenzoic acid (1.5 equiv.) in DCM (5 mL) was stirred at room temperature for 3 h. The reaction mixture was diluted with ethyl acetate and saturated NaHCO<sub>3</sub> aqueous solution, and extracted three times with ethyl acetate. The combined organic layer was washed with brine once, then dried over anhydrous MgSO<sub>4</sub>, filtered, and concentrated under reduced pressure.

The evaporated residue was dissolved in methanol (5 mL), and then addition of NaOH (1 equiv.) for ester hydrolysis. The reaction mixture was stirred for 3 h. After the completion of the reaction monitored by TLC, the resulting mixture was diluted with ethyl acetate, and washed with saturated NH<sub>4</sub>Cl aqueous solution

and brine. The combined organic layer was dried over anhydrous  $\text{MgSO}_4$ , then filtered, and concentrated under reduced pressure. The resulting product was used directly for the next reaction without further purification. The remained evaporated residue and imidazole (1.5 equiv.) was stirred in anhydrous DCM (20 mL) for 15 min at room temperature. To the solution was added TBSCl (1.1 equiv.) and the reaction mixture was stirred for 1 h at room temperature. Then the solution was extracted with excess ethyl acetate and washed with saturated  $\text{NH}_4\text{Cl}$  aqueous solution and brine. The organic layer was dried over anhydrous  $\text{MgSO}_4$  and filtered. Then, the filtrate was condensed under reduced pressure. The desired product **7** was obtained by the purification using silica-gel flash column chromatography (EtOAc:hexane = 1:50).

Yield: 95% (3-step yield),  $R_f$  = 0.71 (1:6 = EtOAc:hexane, v/v);  $^1\text{H}$  NMR (500 MHz,  $\text{CDCl}_3$ )  $\delta$  7.02 (s, 1H), 6.50 (s, 1H), 3.81 (s, 3H), 3.75 (s, 3H), 0.99 (s, 9H), 0.16 (s, 6H);  $^{13}\text{C}$  NMR (125 MHz,  $\text{CDCl}_3$ )  $\delta$  150.3, 145.7, 145.3, 117.4, 106.9, 102.0, 56.9, 56.5, 25.8, 18.6, -4.5; HRMS (FAB $^+$ )  $m/z$  calcd for  $\text{C}_{14}\text{H}_{23}\text{BrO}_3\text{Si}$   $[\text{M}]^+$  346.0600, found 346.0598.

#### General procedure for synthesis of compounds **8–19** via Suzuki Coupling Reaction

Compound **2a** or **2b** (0.100 mmol, 1 equiv.), one of boronic acids/boronic esters (2 equiv.),  $\text{Pd}(\text{PPh}_3)_4$  (5 mol %),  $\text{Na}_2\text{CO}_3$  (3 equiv.) were suspended in a solvent mixture of Toluene/EtOH/ $\text{H}_2\text{O}$  (2:1:1, total volume of 4 mL). The reaction mixture was stirred at 80 °C for 2 h ~ 8 h and the completion of the reaction was monitored by TLC. When the starting material **2a** or **2b** was all consumed, the resulting mixture was diluted with ethyl acetate and washed with brine. The combined organic layer was dried over anhydrous  $\text{MgSO}_4$ , then filtered, and concentrated under reduced pressure. After a short silica-gel filtration, the resulting product was used directly for the next reaction without further purification. The solution of previous prepared compound in HF/Pyridine/THF (1:1:18, volumetric ratio, total volume of 3 mL) was stirred for 5 h at room temperature in a plastic vessel. After the reaction completion, Additional fluoride source was quenched with excess TMSOEt (6 mL). The mixture was evaporated under reduced pressure, the resultant was purified with silica gel flash column chromatography (with EtOAc:hexane) to provide the desired products, compounds **8–19**.

#### Compound **8**, 3-(2,5-dimethoxyphenyl)-2H-chromen-7-ol

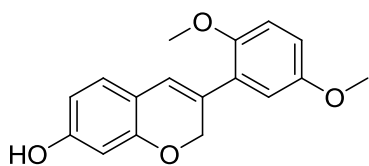

Compound **8** was prepared by the general procedure with **2a** and 2,5-dimethoxyphenylboronic acid as the starting materials.

Yield: 69% (2-step yield),  $R_f$  = 0.49 (1:10 = EtOAc:hexane, v/v);  $^1\text{H}$  NMR (500 MHz,  $\text{CDCl}_3$ )  $\delta$  6.95 (d, 1H,  $J$  = 8.0 Hz), 6.88 (s, 1H), 6.82 (d, 1H,  $J$

= 2.0 Hz), 6.59 (s, 1H), 6.38–6.41 (m, 2H), 5.01 (d, 2H,  $J = 1.5$  Hz), 3.80 (s, 3H), 3.78 (s, 3H);  $^{13}\text{C}$  NMR (125 MHz,  $\text{CDCl}_3$ )  $\delta$  156.7, 155.2, 153.9, 151.7, 129.5, 128.8, 128.0, 122.6, 117.1, 114.7, 113.7, 112.2, 108.7, 103.2, 68.3, 56.2, 56.0; HRMS (FAB $^+$ )  $m/z$  calcd for  $\text{C}_{17}\text{H}_{16}\text{O}_4$   $[\text{M}]^+$  284.1049, found 284.1052.

Compound **9**, 3-(2-methoxyphenyl)-2H-chromen-7-ol

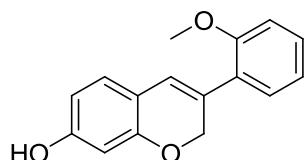

Compound **9** was prepared by the general procedure with **2a** and 2-methoxyphenylboronic acid as the starting materials.

Yield: 70% (2-step yield),  $R_f = 0.25$  (1:10 = EtOAc:hexane, v/v);  $^1\text{H}$  NMR (400 MHz,  $\text{CDCl}_3$ )  $\delta$  7.25–7.32 (m, 2H), 6.87–6.99 (m, 3H), 6.57 (s, 1H), 6.39–6.42

(m, 2H), 5.01 (d, 2H,  $J = 1.2$  Hz), 3.82 (s, 3H);  $^{13}\text{C}$  NMR (100 MHz,  $\text{CDCl}_3$ )  $\delta$  157.3, 156.7, 155.0, 129.6, 129.1, 128.9, 128.0, 127.9, 122.4, 121.1, 117.1, 111.0, 108.7, 103.2, 68.4, 55.5; HRMS (FAB $^+$ )  $m/z$  calcd for  $\text{C}_{16}\text{H}_{14}\text{O}_3$   $[\text{M}]^+$  254.0943, found 254.0947.

Compound **10**, 3-(3-methoxyphenyl)-2H-chromen-7-ol

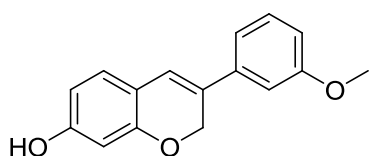

Compound **10** was prepared by the general procedure with **2a** and 3-methoxyphenylboronic acid as the starting materials.

Yield: 55% (2-step yield),  $R_f = 0.24$  (1:10 = EtOAc:hexane, v/v);  $^1\text{H}$  NMR (500 MHz,  $\text{CDCl}_3$ )  $\delta$  7.25–7.32 (m, 1H), 6.92–7.01 (m, 3H), 6.85 (dd, 1H,

$J=8.2, 2.6$  Hz), 6.76 (s, 1H), 6.37–6.42 (m, 2H), 5.12 (d, 2H,  $J = 1.2$  Hz), 5.00 (br. s, 1H) 3.84 (s, 3H);  $^{13}\text{C}$  NMR (125 MHz,  $\text{CDCl}_3$ )  $\delta$  160.0, 156.7, 154.8, 138.5, 129.8, 128.7, 128.2, 120.3, 117.3, 116.5, 113.0, 110.6, 108.8, 103.2, 67.4, 55.5; HRMS (FAB $^+$ )  $m/z$  calcd for  $\text{C}_{16}\text{H}_{14}\text{O}_3$   $[\text{M}]^+$  254.0943, found 254.0945.

Compound **11**, 3-(4-methoxyphenyl)-2H-chromen-7-ol

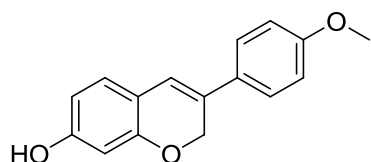

Compound **11** was prepared by the general procedure with **2a** and 4-methoxyphenylboronic acid as the starting materials.

Yield: 62% (2-step yield),  $R_f = 0.24$  (1:10 = EtOAc:hexane, v/v);  $^1\text{H}$  NMR (500 MHz, acetone- $d_6$ )  $\delta$  7.46 (dd, 2H,  $J = 3.8, 8.3$  Hz), 6.94–6.99 (m, 3H),

6.81 (s, 1H), 6.42 (dd, 2H,  $J = 2.5, 8.0$  Hz), 6.33 (d, 1H,  $J = 2.5$  Hz), 5.08 (d, 2H,  $J = 4.5$  Hz), 3.81 (s, 3H);  $^{13}\text{C}$  NMR (125 MHz,  $\text{CDCl}_3$ )  $\delta$  160.3, 155.4, 130.3, 128.7, 126.6, 118.9, 116.5, 115.0, 109.5, 103.5, 67.7, 55.7; HRMS (FAB $^+$ )  $m/z$  calcd for  $\text{C}_{16}\text{H}_{14}\text{O}_3$   $[\text{M}]^+$  254.0943, found 254.0948.

Compound **12**, 3-(4-hydroxyphenyl)-2H-chromen-7-ol

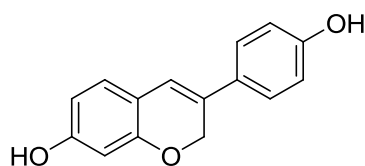

Synthetic procedure of used boronic ester for compound **12** was as follows: To a solution of 4-(4,4,5,5-tetramethyl-1,3,2-dioxaborolan-2-yl)phenol (1.00 mmol, 1 equiv.) and imidazole (1.5 equiv.) in DMF (3 mL) was added TBSCl (1.1 equiv.) and the reaction mixture was stirred for 5 h at room temperature.

Then the solution was extracted with excess ethyl acetate and washed with saturated  $\text{NH}_4\text{Cl}$  aqueous solution and brine. The organic layer was dried over anhydrous  $\text{MgSO}_4$  and filtered. Then, the filtrate was condensed under reduced pressure. The desired boronic ester *tert*-butyldimethyl(4-(4,4,5,5-tetramethyl-1,3,2-dioxaborolan-2-yl)phenoxy)silane was obtained by the purification using silica-gel flash column chromatography (EtOAc:hexane = 1:50). Yield: 84%,  $R_f$  = 0.48 (1:30 = EtOAc:hexane, v/v);  $^1\text{H}$  NMR (400 MHz,  $\text{CDCl}_3$ )  $\delta$  7.69 (d, 2H,  $J$  = 8.4 Hz), 6.83 (d, 2H,  $J$  = 8.4 Hz), 1.33 (s, 12H), 0.98 (s, 9H), 0.20 (s, 6H);  $^{13}\text{C}$  NMR (100 MHz,  $\text{CDCl}_3$ )  $\delta$  158.7, 136.6, 119.8, 83.7, 60.5, 25.8, 25.0, 18.4, -4.3.

Compound **12** was prepared by the general procedure with **2a** and prepared *tert*-butyldimethyl(4-(4,4,5,5-tetramethyl-1,3,2-dioxaborolan-2-yl)phenoxy)silane as the starting materials.

Yield: 57% (2-step yield),  $R_f$  = 0.42 (1:1 = EtOAc:hexane, v/v);  $^1\text{H}$  NMR (500 MHz,  $\text{CD}_3\text{OD}$ )  $\delta$  7.29 (d, 2H,  $J$  = 8.5 Hz), 6.90 (d, 1H,  $J$  = 8.0 Hz), 6.77–6.81 (m, 2H), 6.66 (s, 1H), 6.26–6.35 (m, 1H), 6.26 (d, 1H,  $J$  = 2.0 Hz), 5.02 (s, 2H);  $^{13}\text{C}$  NMR (125 MHz,  $\text{CD}_3\text{OD}$ )  $\delta$  159.2, 158.2, 155.7, 129.4, 128.6, 127.5, 127.5, 126.8, 118.5, 117.0, 116.5, 109.6, 103.5, 68.2; HRMS ( $\text{FAB}^+$ )  $m/z$  calcd for  $\text{C}_{15}\text{H}_{12}\text{O}_3$   $[\text{M}]^+$  240.0786, found 240.0789.

Compound **13**, 3-(3-hydroxyphenyl)-2H-chromen-7-ol

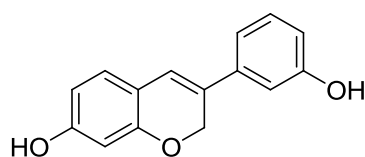

Compound **13** was prepared by the general procedure with **2a** and 3-hydroxyphenylboronic acid as the starting materials.

Yield: 58% (2-step yield),  $R_f$  = 0.46 (1:1 = EtOAc:hexane, v/v);  $^1\text{H}$  NMR (500 MHz,  $\text{DMSO}-d_6$ )  $\delta$  7.17 (t, 1H,  $J$  = 8.0 Hz), 6.98 (d, 1H,  $J$  = 6.4 Hz), 6.92 (d, 1H,  $J$  = 6.4 Hz), 6.84–6.86 (m, 2H), 6.34 (dd, 1H,  $J$  = 1.6, 6.8 Hz), 6.25 (s, 1H), 5.03 (s, 2H);  $^{13}\text{C}$  NMR (75 MHz,  $\text{DMSO}-d_6$ )  $\delta$  158.8, 157.7, 154.2, 137.7, 129.6, 128.1, 127.1, 119.5, 115.1, 114.6, 114.4, 111.0, 108.8, 102.4, 66.3; HRMS ( $\text{FAB}^+$ )  $m/z$  calcd for  $\text{C}_{15}\text{H}_{12}\text{O}_3$   $[\text{M}]^+$  240.0786, found 240.0788.

Compound **14**, 3-phenyl-2H-chromen-7-ol

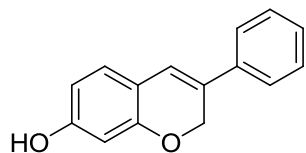

Compound **14** was prepared by the general procedure with **2a** and phenylboronic acid as the starting materials.

Yield: 51% (2-step yield),  $R_f$  = 0.71 (1:10 = EtOAc:hexane, v/v);  $^1\text{H}$  NMR (500 MHz,  $\text{CD}_2\text{Cl}_2$ )  $\delta$  7.27–7.44 (m, 5H), 6.98 (d, 1H,  $J$  = 8.5 Hz), 6.80 (s, 1H), 6.41 (dd, 1H,  $J$  = 2.5, 8.0 Hz), 6.36 (d, 1H,  $J$  = 1.5 Hz), 5.14 (s, 2H);  $^{13}\text{C}$  NMR (125 MHz,  $\text{CD}_2\text{Cl}_2$ )  $\delta$  157.2, 137.2, 129.1, 128.4, 128.0, 124.8, 120.0, 126.7, 108.9, 103.2, 67.6; HRMS (FAB $^+$ )  $m/z$  calcd for  $\text{C}_{15}\text{H}_{12}\text{O}_3$  [M] $^+$  223.0759, found 223.0766.

Compound **15**, 3-(4-(hydroxymethyl)phenyl)-2H-chromen-7-ol

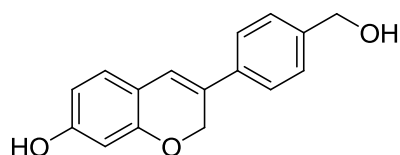

Compound **15** was prepared by the general procedure with **2a** and 4-(hydroxymethyl)phenylboronic acid as the starting materials.

Yield: 57% (2-step yield),  $R_f$  = 0.41 (1:10 = MeOH:DCM, v/v);  $^1\text{H}$  NMR (400 MHz,  $\text{DMSO}-d_6$ )  $\delta$  7.46 (d, 2H,  $J$  = 8.4 Hz), 7.32 (d, 2H,  $J$  = 8.4 Hz), 6.98 (d, 1H,  $J$  = 8.0 Hz), 6.94 (s, 1H), 6.35 (dd, 2H,  $J$  = 2.0, 8.0 Hz), 6.26 (d, 1H,  $J$  = 2.0 Hz), 5.08 (d, 1H,  $J$  = 1.2 Hz), 4.50 (s, 2H);  $^{13}\text{C}$  NMR (100 MHz,  $\text{DMSO}-d_6$ )  $\delta$  158.7, 154.1, 141.9, 134.7, 128.0, 127.0, 126.7, 124.0, 119.1, 114.5, 108.8, 102.4, 66.3, 62.6; HRMS (FAB $^+$ )  $m/z$  calcd for  $\text{C}_{16}\text{H}_{14}\text{O}_3$  [M] $^+$  254.0943, found 254.0941.

Compound **16**, 3-(2-methoxyphenyl)-2,2-dimethyl-2H-chromen-7-ol

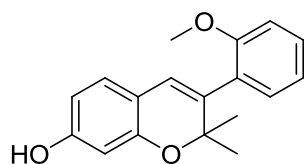

Compound **16** was prepared by the general procedure with **2b** and 2-methoxyphenylboronic acid as the starting materials.

Yield: 71% (2-step yield),  $R_f$  = 0.22 (1:10 = EtOAc:hexane, v/v);  $^1\text{H}$  NMR (500 MHz,  $\text{CDCl}_3$ )  $\delta$  7.30 (t, 1H,  $J$  = 7.8 Hz), 7.14 (d, 1H,  $J$  = 6.0 Hz), 6.89–6.96 (m, 3H), 6.39 (br. s, 1H), 6.36 (br. s, 1H), 6.21 (s, 1H), 3.81 (s, 3H), 1.26 (s, 6H);  $^{13}\text{C}$  NMR (125 MHz,  $\text{CDCl}_3$ )  $\delta$  157.4, 156.5, 154.2, 137.0, 131.7, 129.1, 129.0, 127.4, 122.7, 120.5, 116.8, 110.7, 108.1, 103.9, 55.3, 26.2; HRMS (FAB $^+$ )  $m/z$  calcd for  $\text{C}_{18}\text{H}_{18}\text{O}_3$  [M] $^+$  282.1256, found 282.1267.

Compound **17**, 3-(3-methoxyphenyl)-2,2-dimethyl-2H-chromen-7-ol

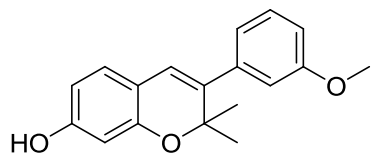

Compound **17** was prepared by the general procedure with **2b** and 3-methoxyphenylboronic acid as the starting materials.

Yield: 75% (2-step yield),  $R_f$  = 0.22 (1:10 = EtOAc:hexane, v/v);  $^1\text{H}$  NMR (500 MHz,  $\text{CDCl}_3$ )  $\delta$  7.23–7.28 (m, 1H), 6.84–6.93 (m, 4H), 6.38 (br. s, 2H), 6.29 (s, 1H), 3.83 (s, 3H), 1.52 (s, 6H);  $^{13}\text{C}$  NMR (125 MHz,  $\text{CDCl}_3$ )  $\delta$  159.4, 156.7, 154.0, 141.2, 139.2, 129.2, 127.5, 122.1, 120.8, 116.5, 114.4, 112.6, 108.3, 103.9, 79.2, 55.4, 27.2; HRMS ( $\text{FAB}^+$ )  $m/z$  calcd for  $\text{C}_{18}\text{H}_{18}\text{O}_3$   $[\text{M}]^+$  282.1256, found 282.1250.

Compound **18**, 3-(4-hydroxyphenyl)-2,2-dimethyl-2H-chromen-7-ol

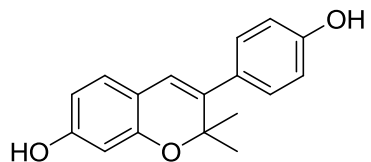

Compound **18** was prepared by the general procedure with **2b** and prepared *tert*-butyldimethyl(4-(4,4,5,5-tetramethyl-1,3,2-dioxaborolan-2-yl)phenoxy) silane (Same boronic ester with synthesis of compound **12**) as the starting materials.

Yield: 88% (2-step yield),  $R_f$  = 0.54 (1:1 = EtOAc:hexane, v/v);  $^1\text{H}$  NMR (400 MHz,  $\text{CD}_3\text{OD}$ )  $\delta$  7.13 (dd, 2H,  $J$  = 2.0, 6.8 Hz), 6.86 (d, 1H,  $J$  = 8.4 Hz), 6.75 (dd, 2H,  $J$  = 2.2, 6.6 Hz), 6.32 (dd, 1H,  $J$  = 2.4, 7.6 Hz), 6.25 (d, 1H,  $J$  = 2.4 Hz), 6.18 (s, 1H), 1.45 (s, 6H);  $^{13}\text{C}$  NMR (100 MHz,  $\text{CD}_3\text{OD}$ )  $\delta$  159.4, 157.9, 154.9, 140.0, 132.4, 130.4, 128.1, 122.2, 117.0, 115.9, 109.2, 104.3, 79.9, 27.4; HRMS ( $\text{FAB}^+$ )  $m/z$  calcd for  $\text{C}_{17}\text{H}_{16}\text{O}_3$   $[\text{M}]^+$  268.1099, found 268.1096.

Compound **19**, 3-(4-methoxyphenyl)-2,2-dimethyl-2H-chromen-7-ol

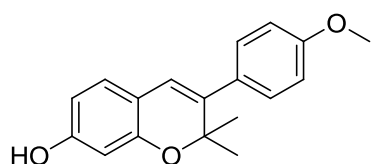

Compound **19** was prepared by the general procedure with **2b** and 4-methoxyphenylboronic acid as the starting materials

Yield: 79% (2-step yield),  $R_f$  = 0.22 (1:10 = EtOAc:hexane, v/v);  $^1\text{H}$  NMR (400 MHz,  $\text{CD}_3\text{OD}$ )  $\delta$  7.22 (dd, 2H,  $J$  = 2.0, 6.8 Hz), 6.87 (dd, 2H,  $J$  = 1.8, 6.6 Hz), 6.85 (s, 1H), 6.32 (dd, 1H,  $J$  = 2.4, 8.0 Hz), 6.26 (d, 1H,  $J$  = 2.0 Hz), 6.20 (s, 1H), 4.89 (br. s, 1H), 3.78 (s, 3H), 1.45 (s, 6H);  $^{13}\text{C}$  NMR (100 MHz,  $\text{CD}_3\text{OD}$ )  $\delta$  160.4, 159.5, 154.9, 139.6, 133.5, 130.4, 128.2, 122.5, 116.8, 114.5, 109.2, 104.3, 79.8, 55.7, 27.4; HRMS ( $\text{FAB}^+$ )  $m/z$  calcd for  $\text{C}_{18}\text{H}_{18}\text{O}_3$   $[\text{M}]^+$  282.1256, found 282.1260.

IV. <sup>1</sup>H and <sup>13</sup>C-NMR spectra for compound **1–19**

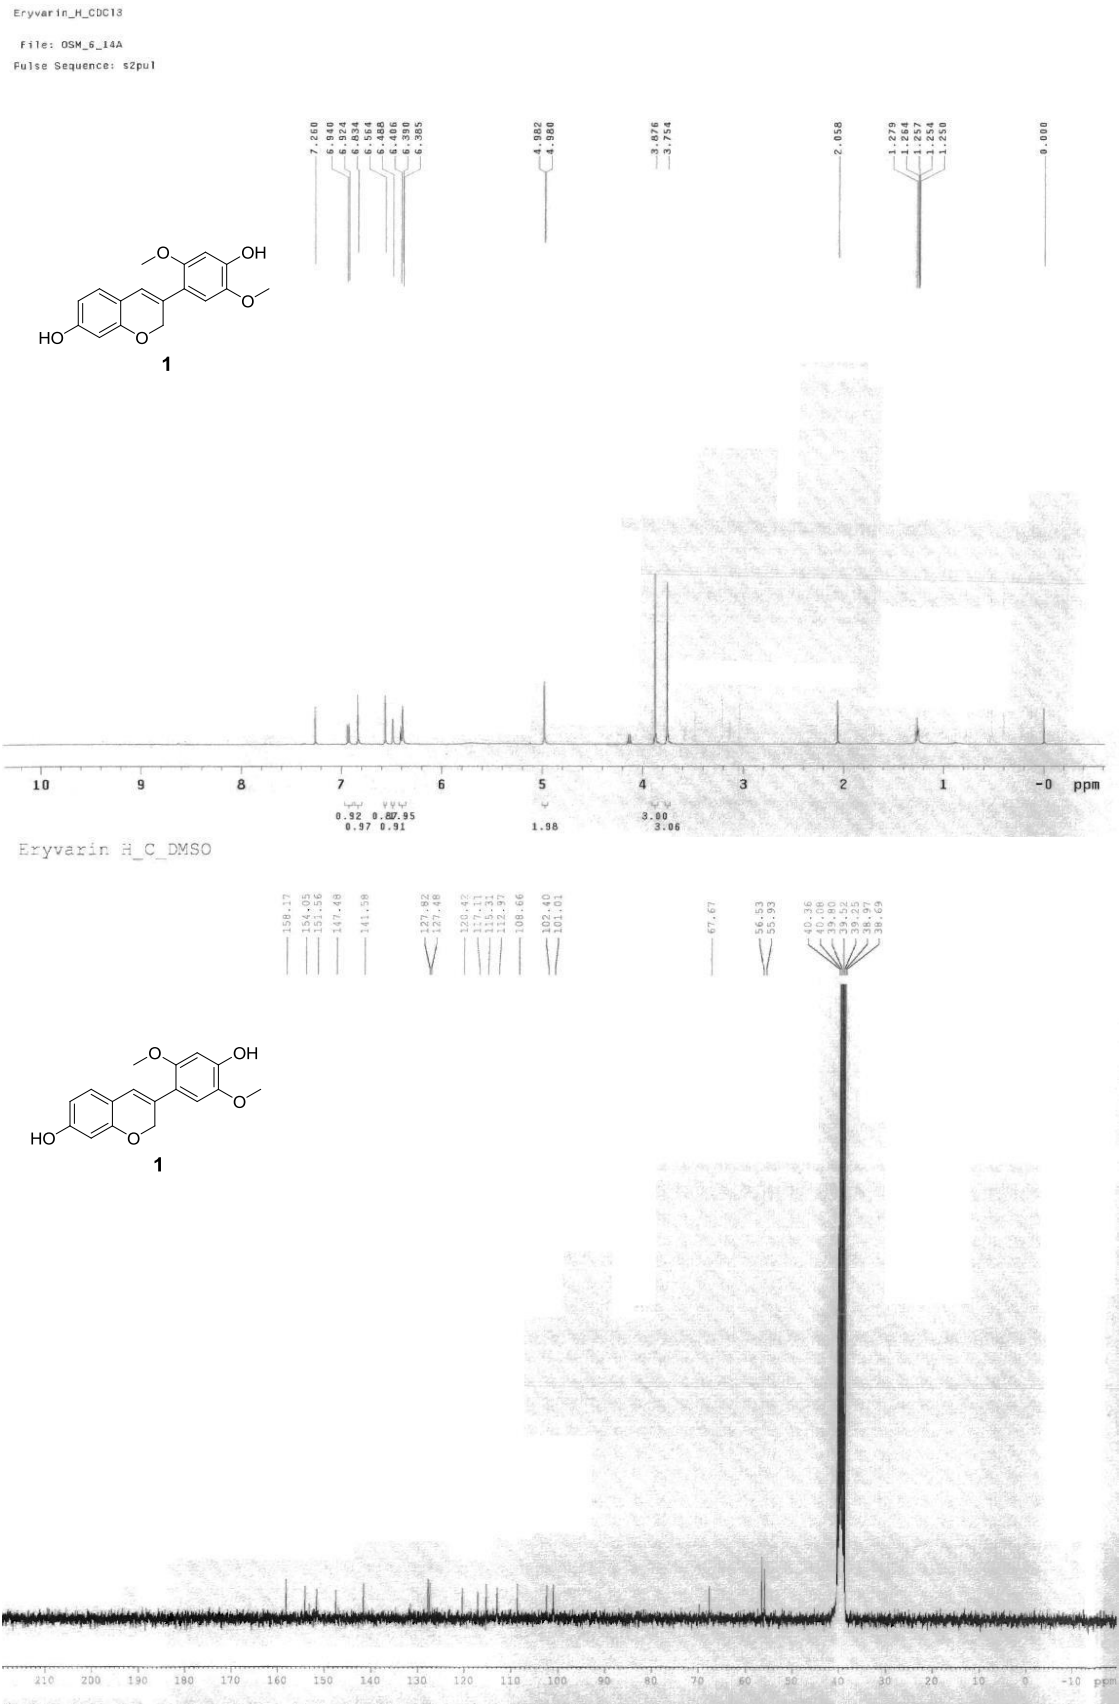

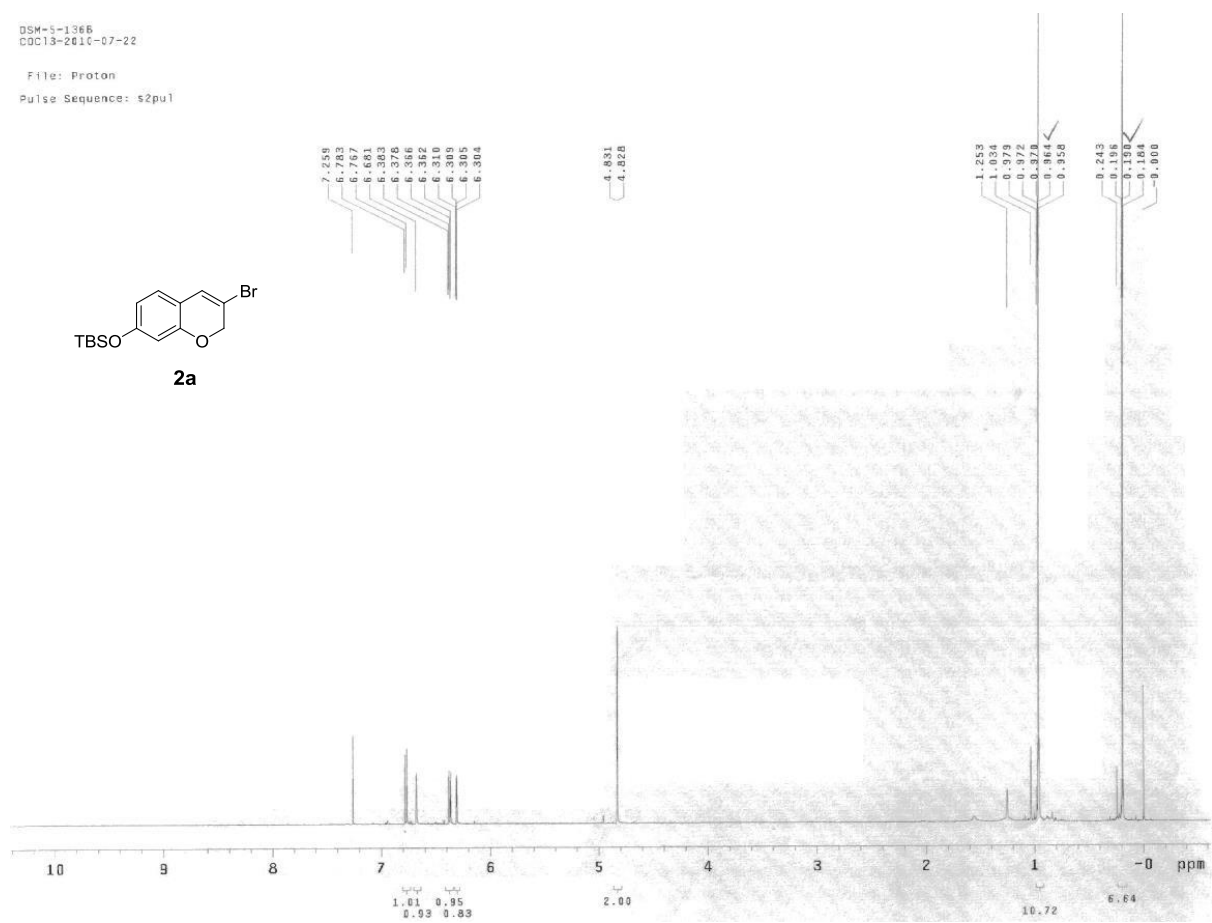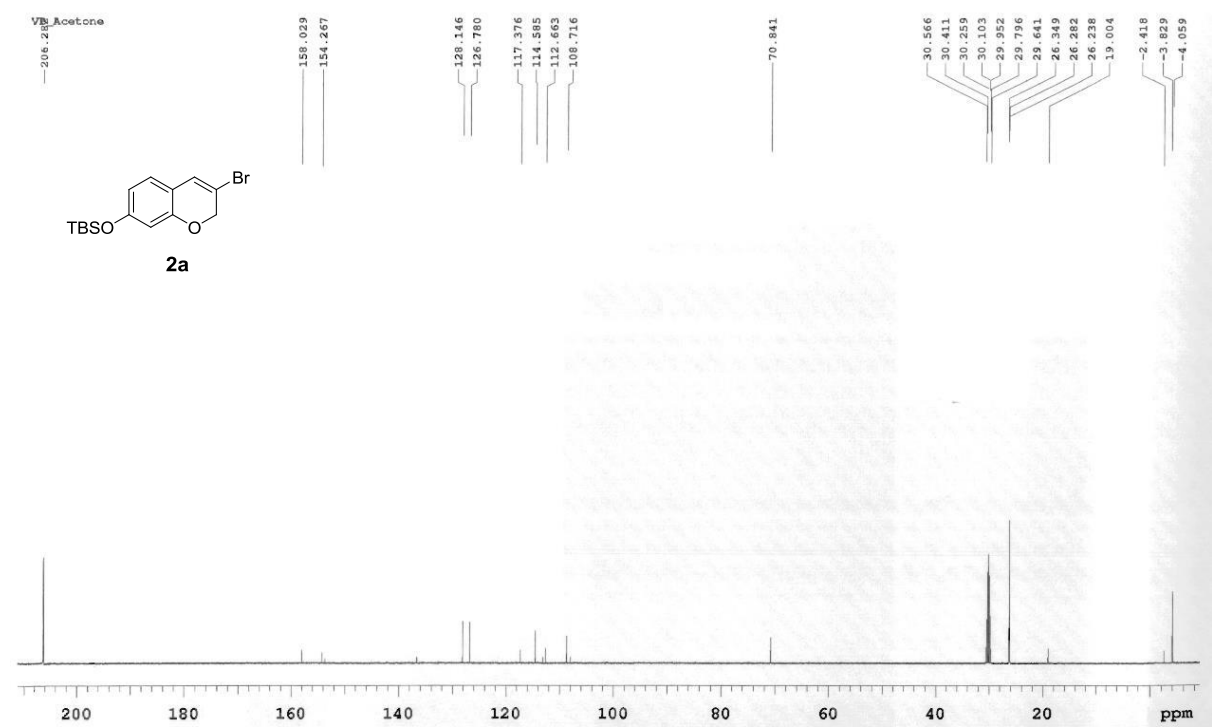

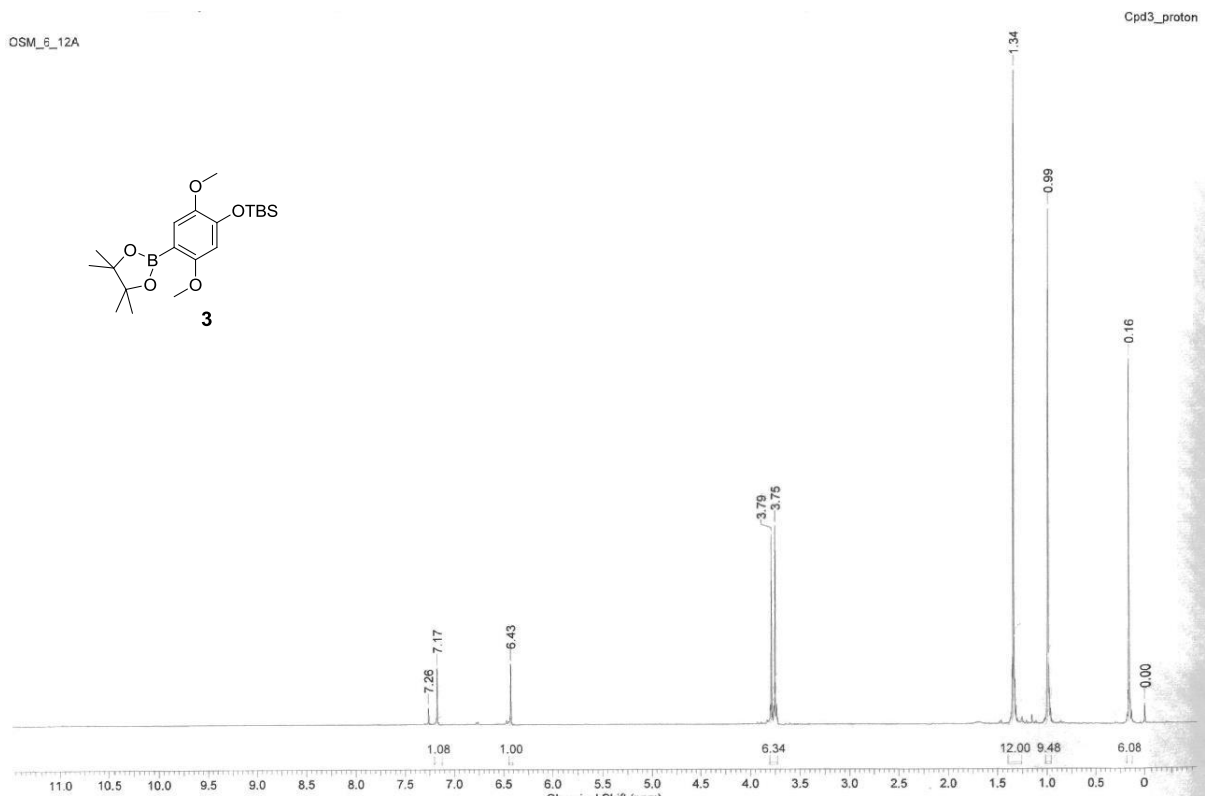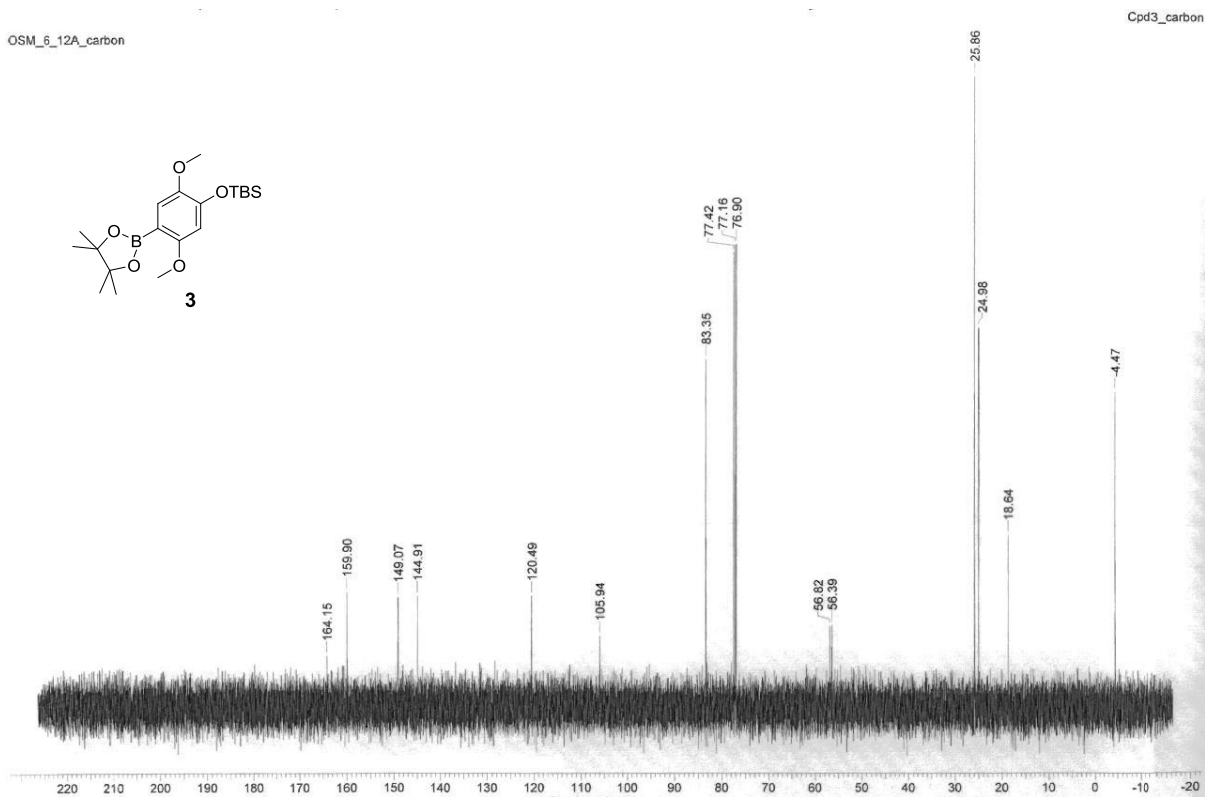

KJY-1-72A  
Acetone\_2010-12-29  
File: KJY-1-72A\_H\_2010-12-29  
Pulse Sequence: s2pul

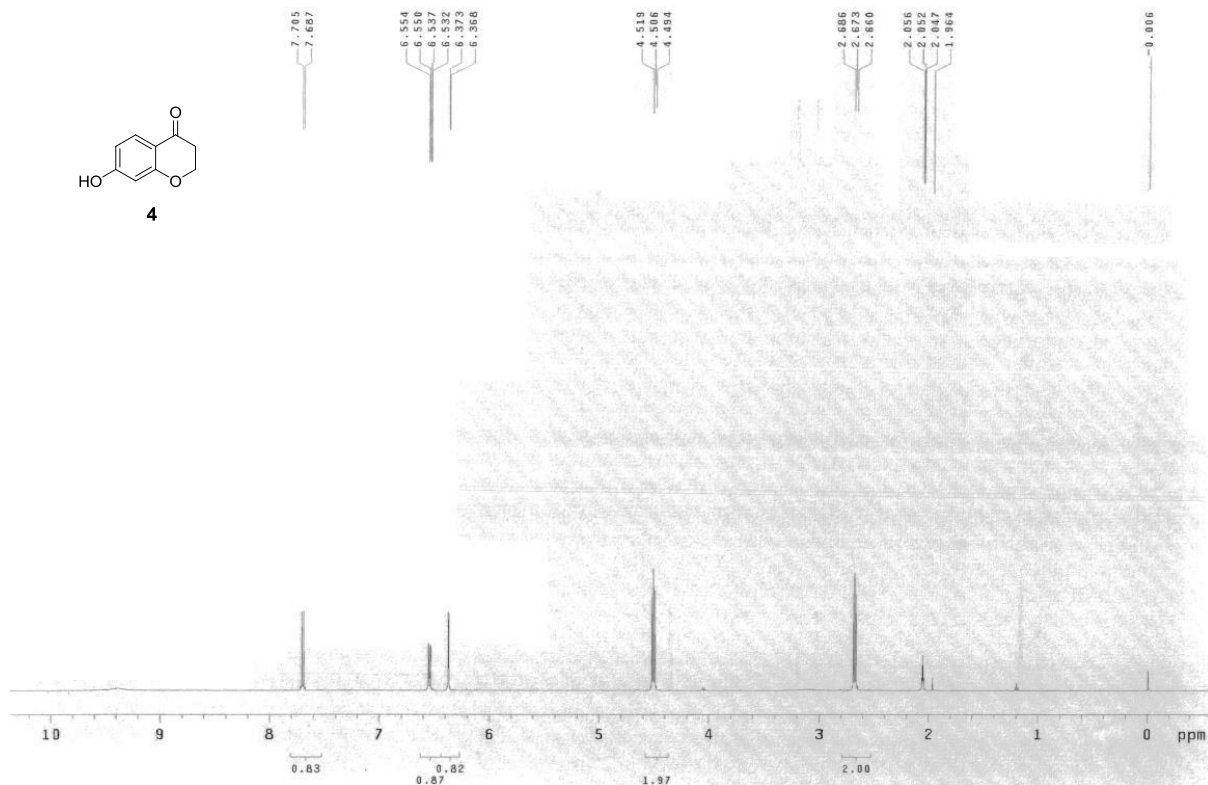

KJY-1-72A  
Acetone\_2010-12-29\_C  
File: KJY-1-72A\_C\_2010-12-29  
Pulse Sequence: s2pul

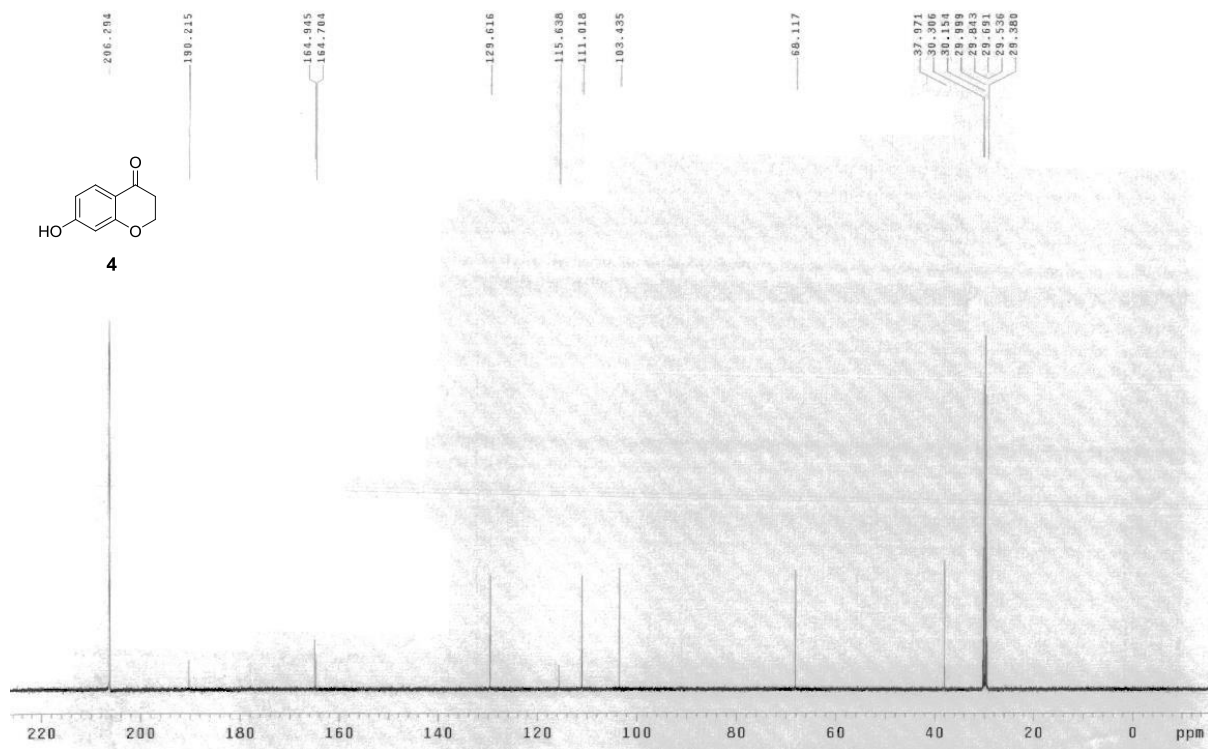

KJY-1-73A  
Acetone\_2010-12-30

File: KJY-1-73A\_H\_2010-12-30  
Pulse Sequence: s2pul

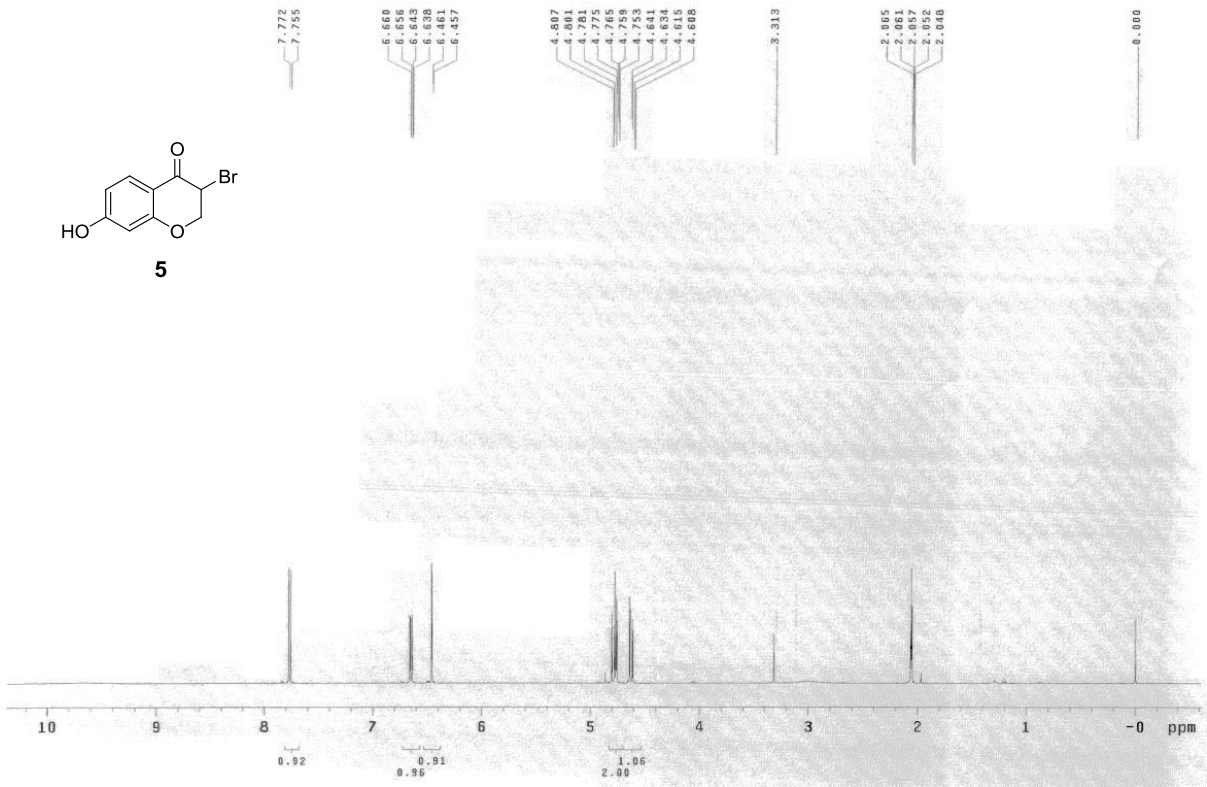

KJY-1-73A  
Acetone\_2010-12-30\_C

File: KJY-1-73A\_C\_2010-12-30  
Pulse Sequence: s2pul

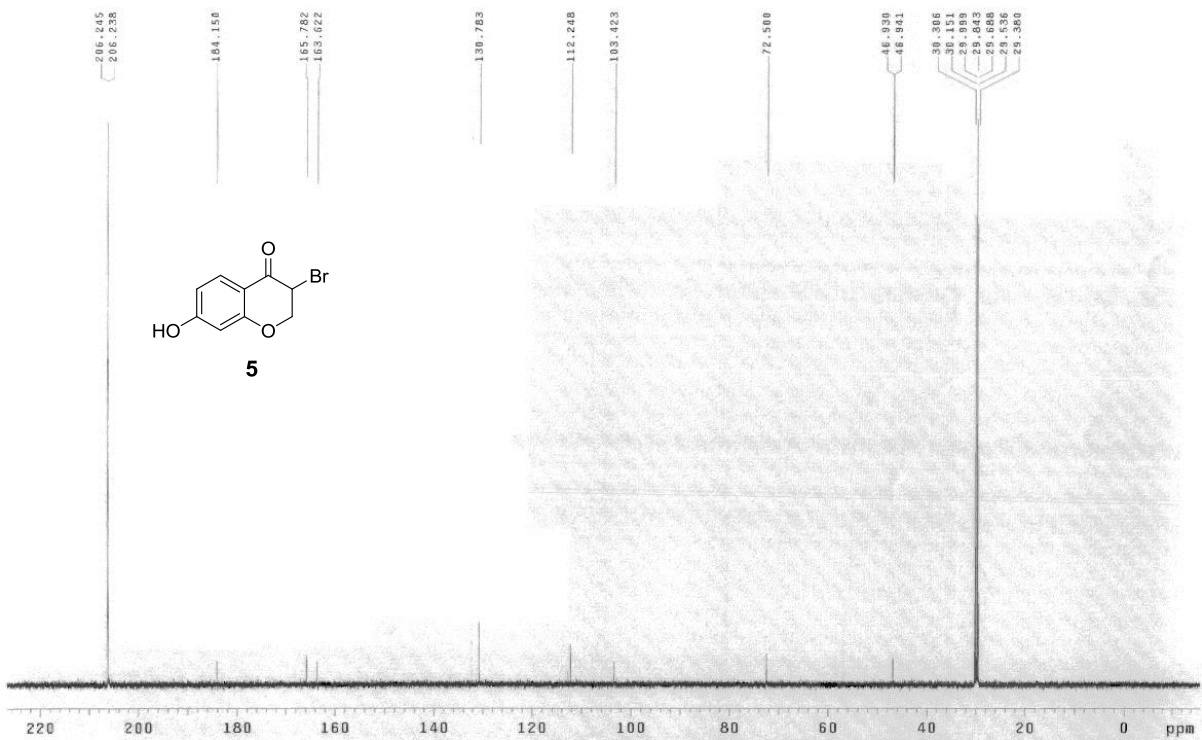

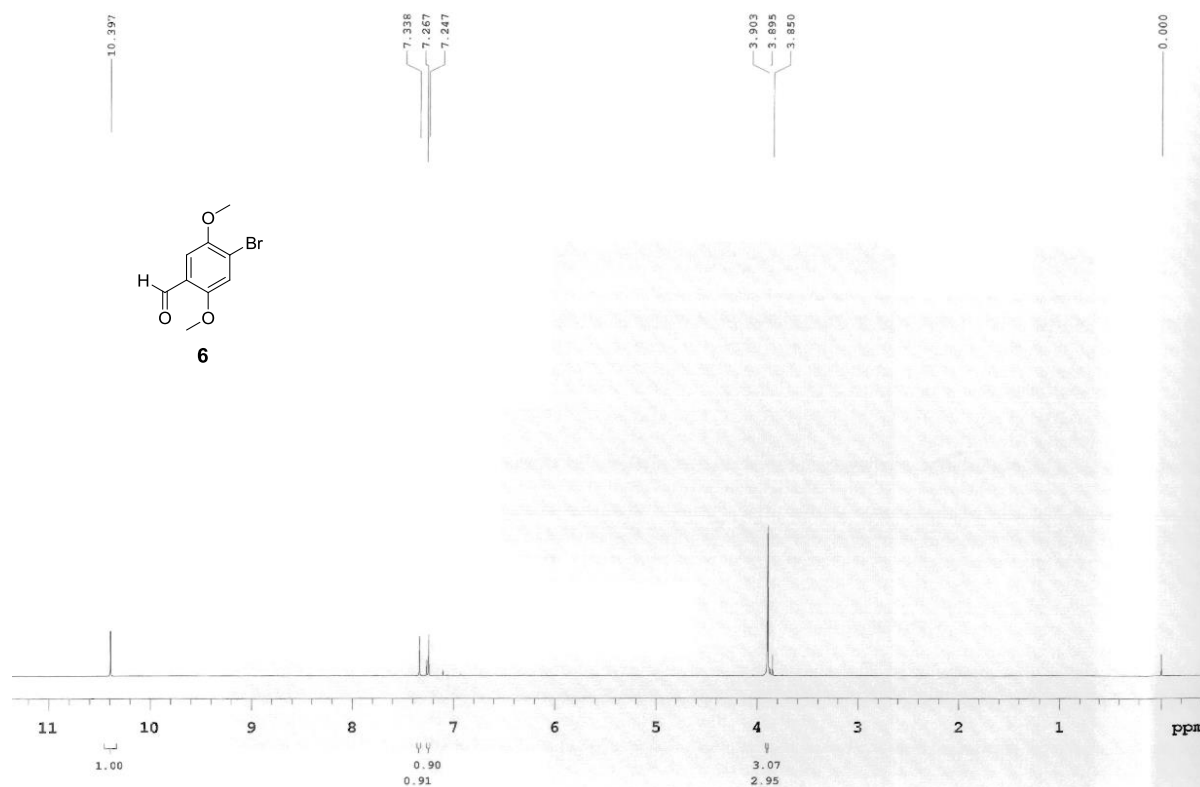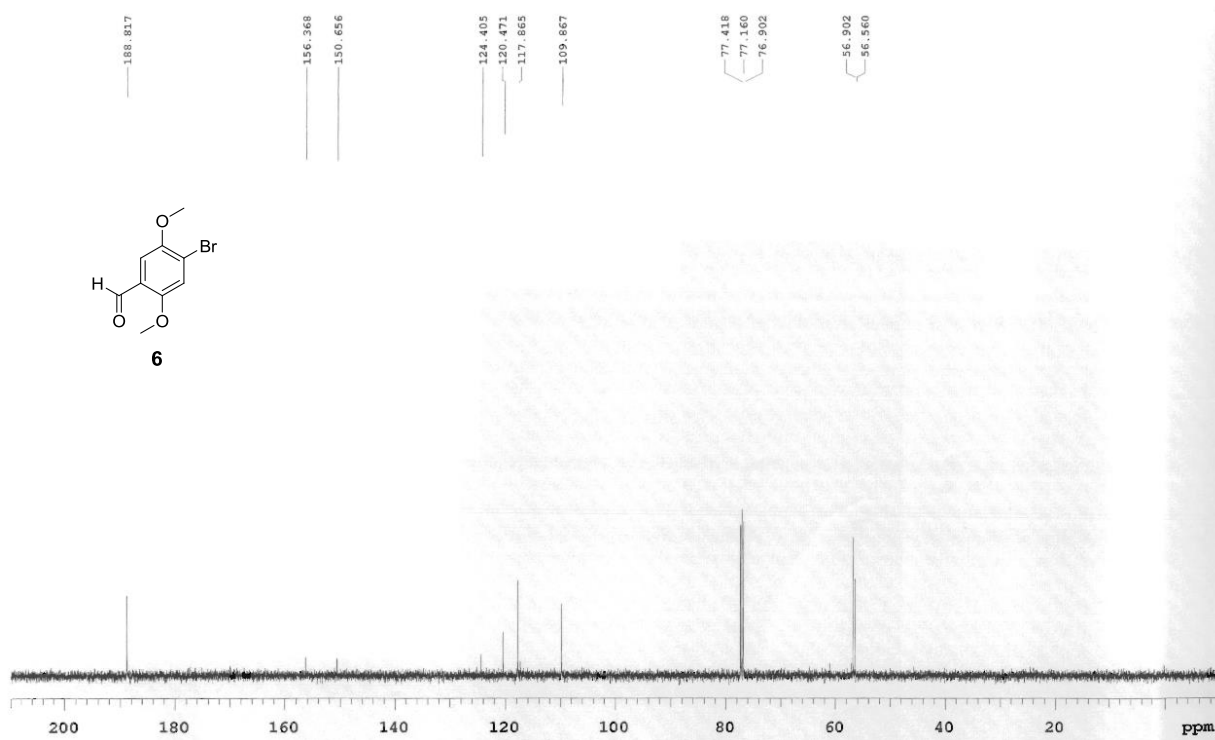

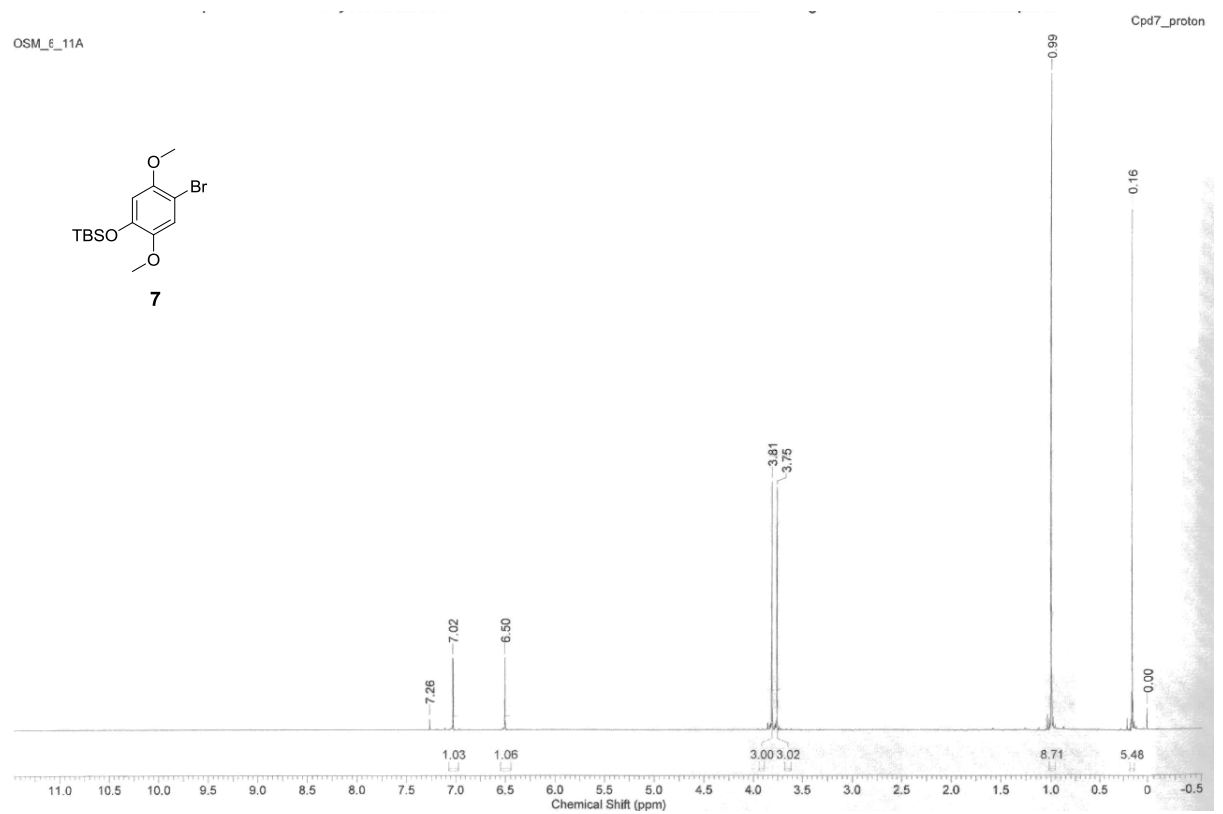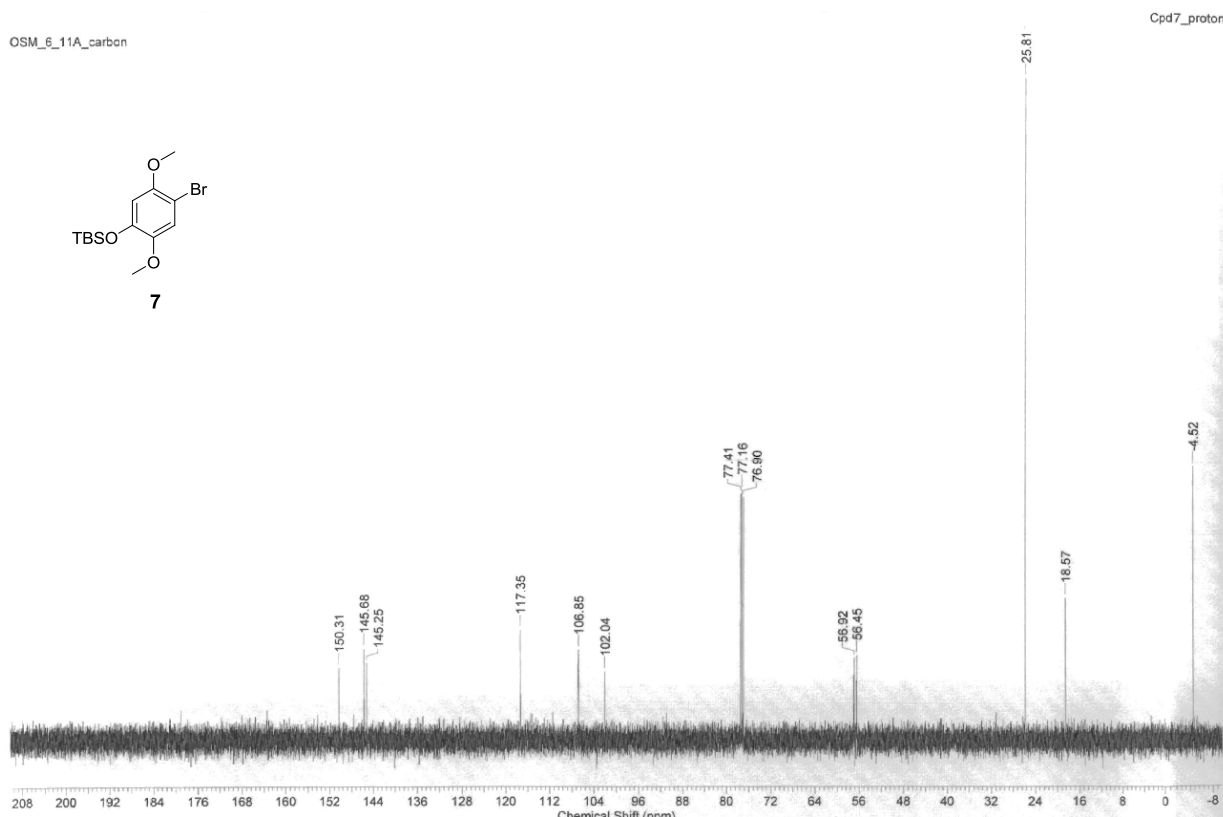

EH\_DM25M  
H<sub>2</sub>OCDCl<sub>3</sub>  
File: KJY-1-91A\_H\_2010-01-26\_CDC13  
Pulse Sequence: s2pu1

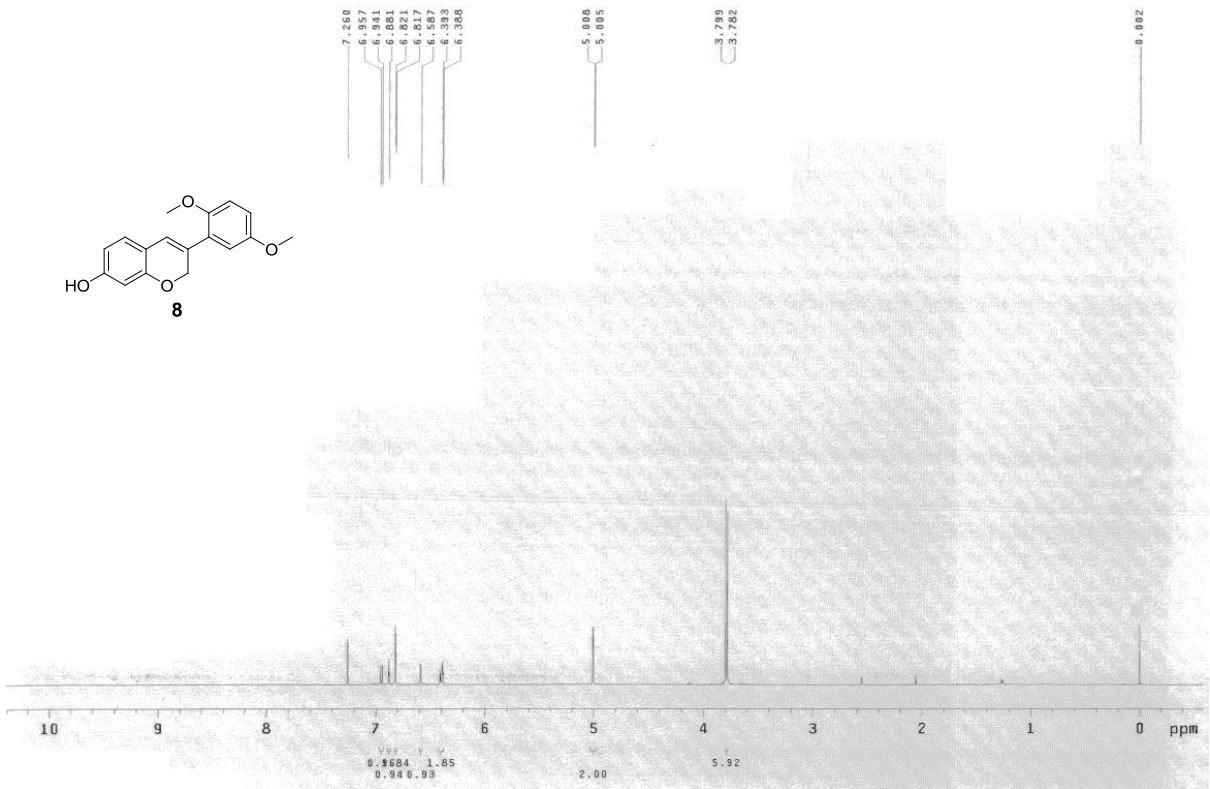

KJY-1-91A  
2010-01-26\_CDC13\_Carbon  
File: KJY-1-91A\_C\_2010-01-26\_CDC13  
Pulse Sequence: s2pu1

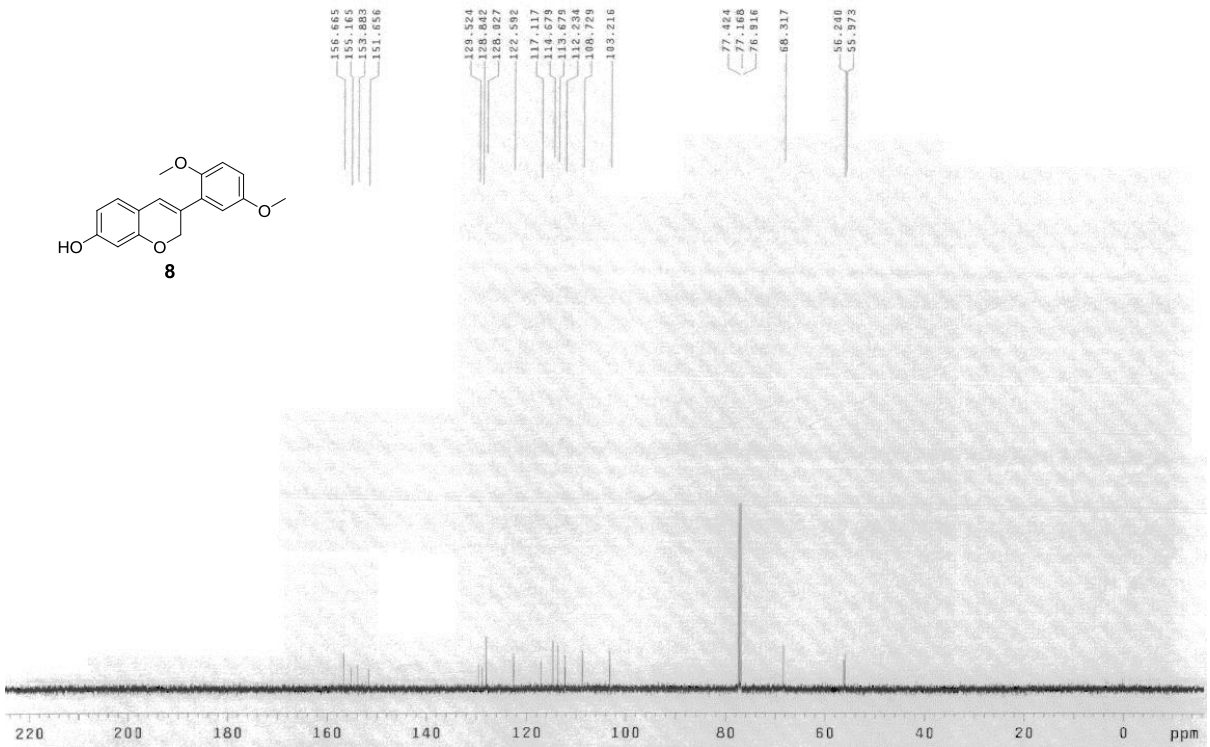

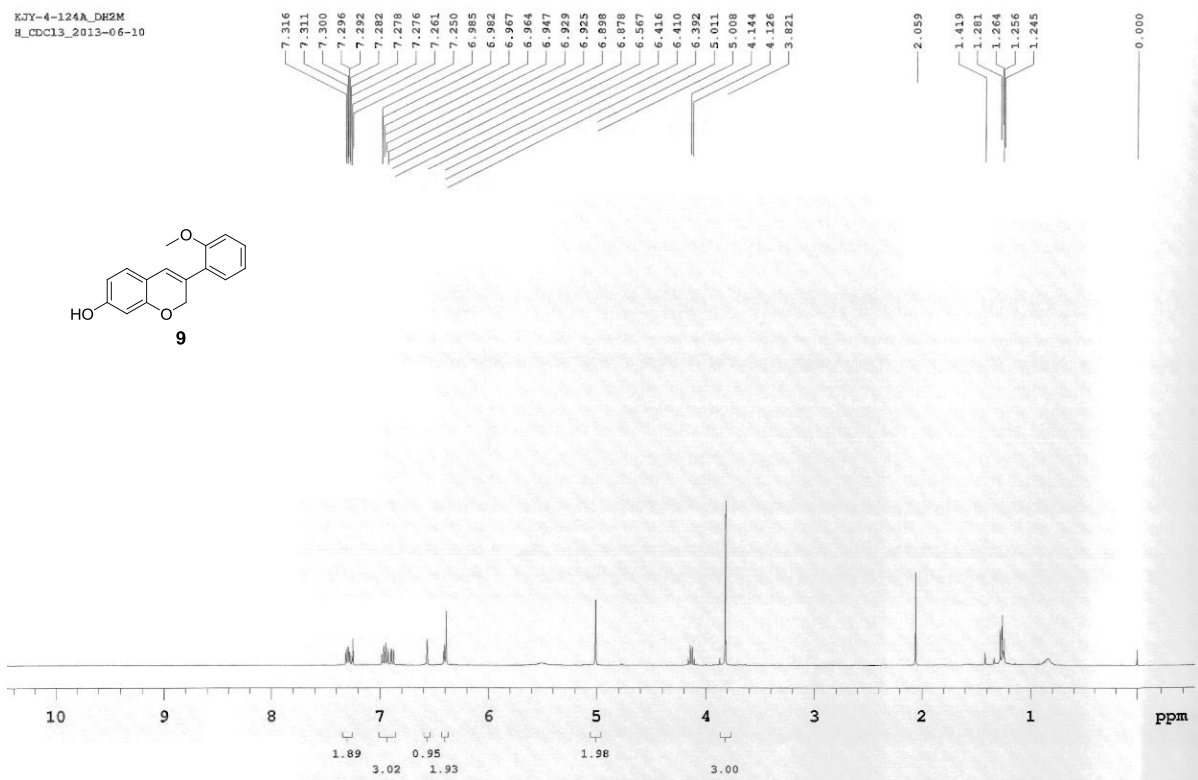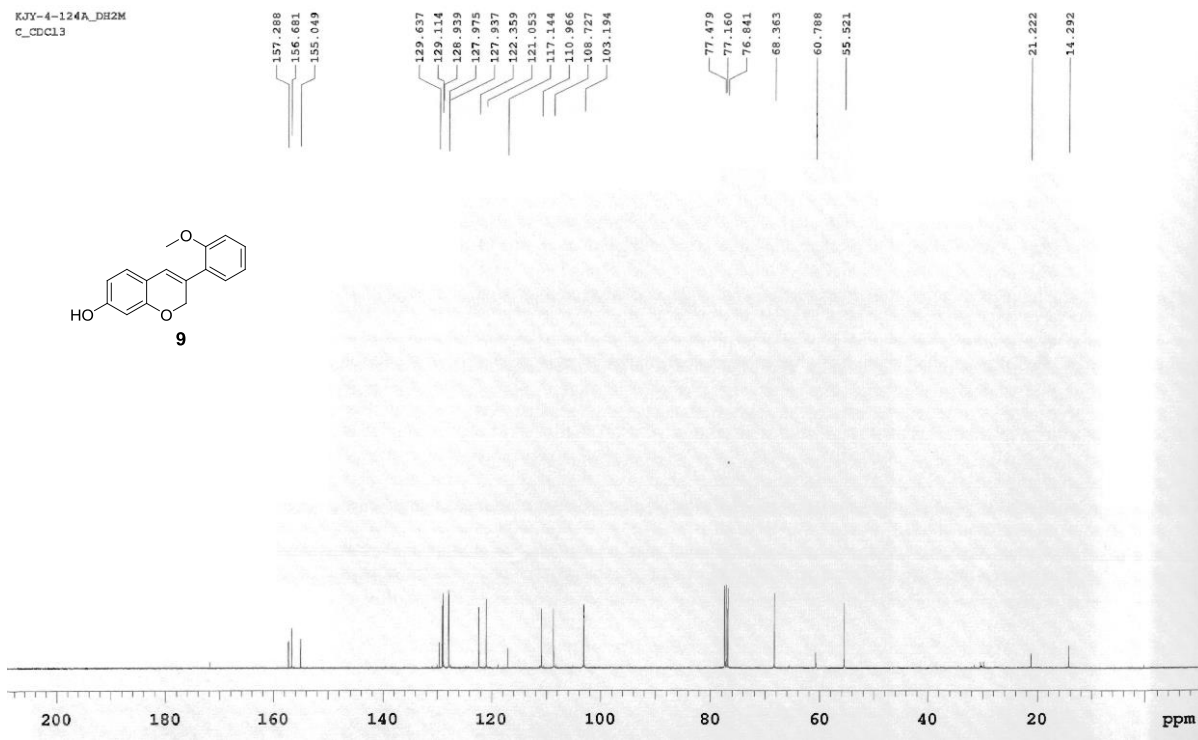

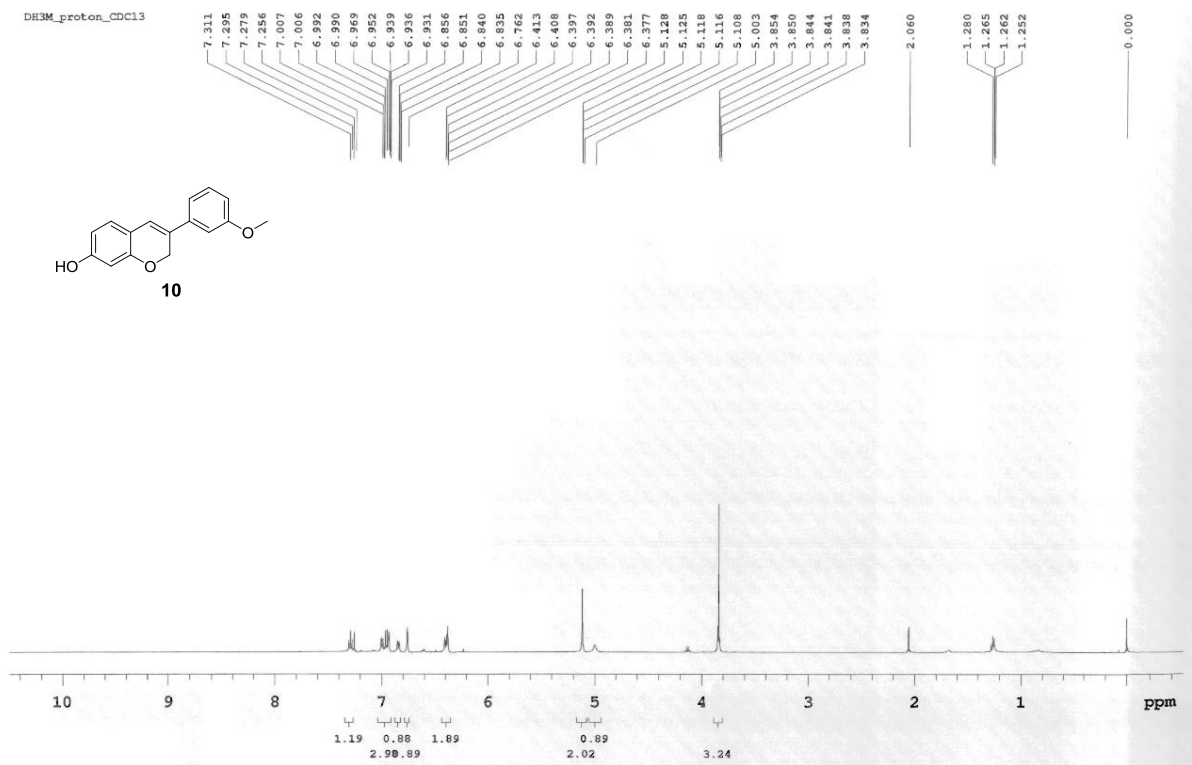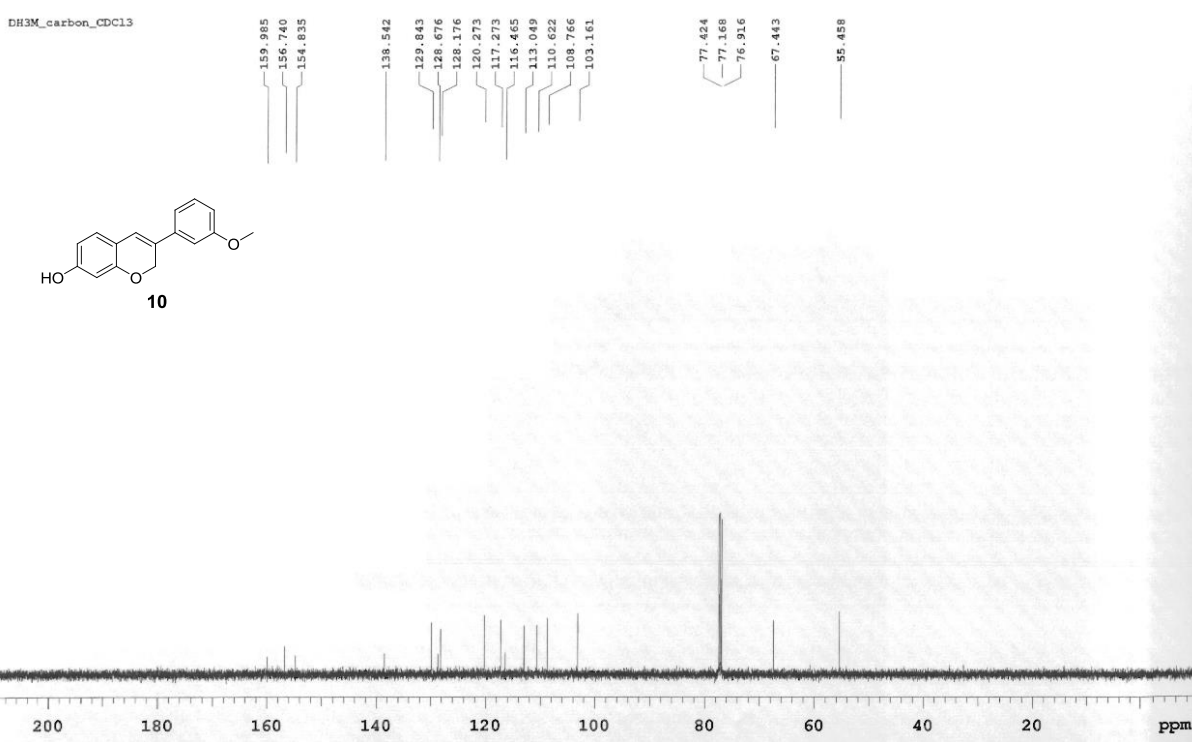

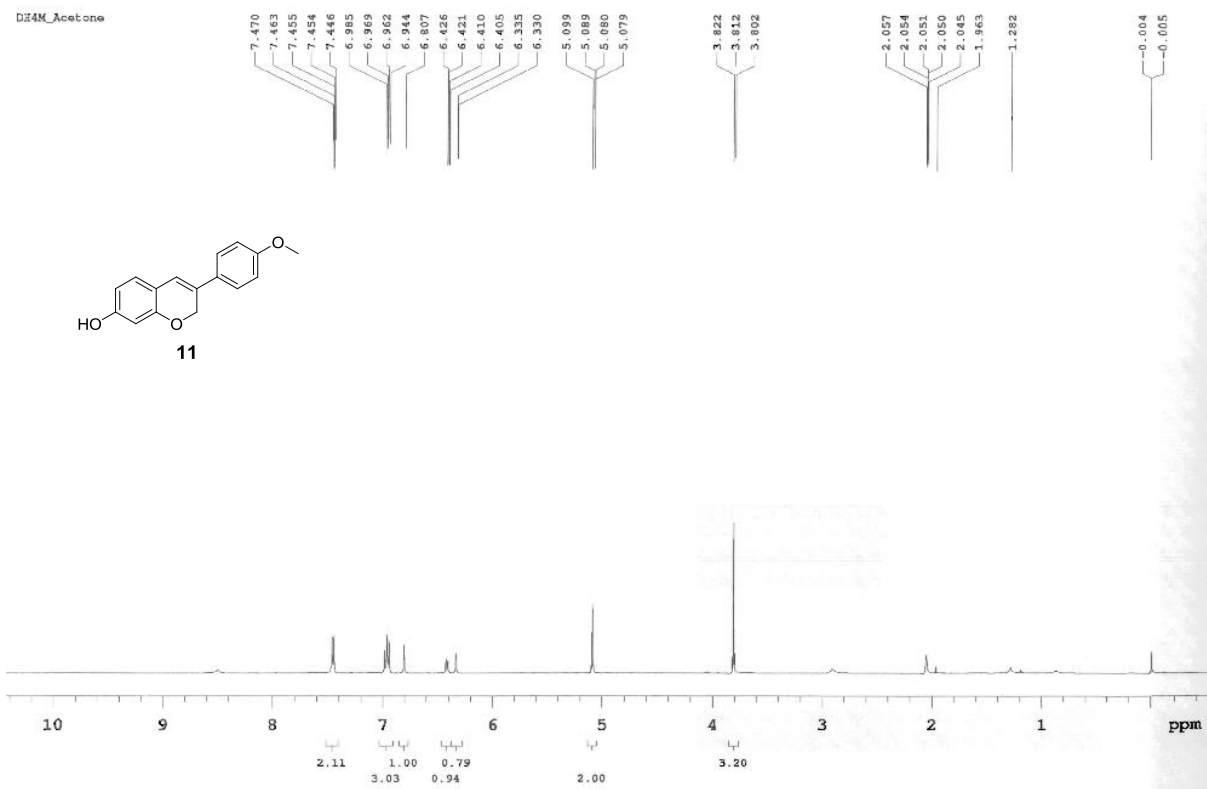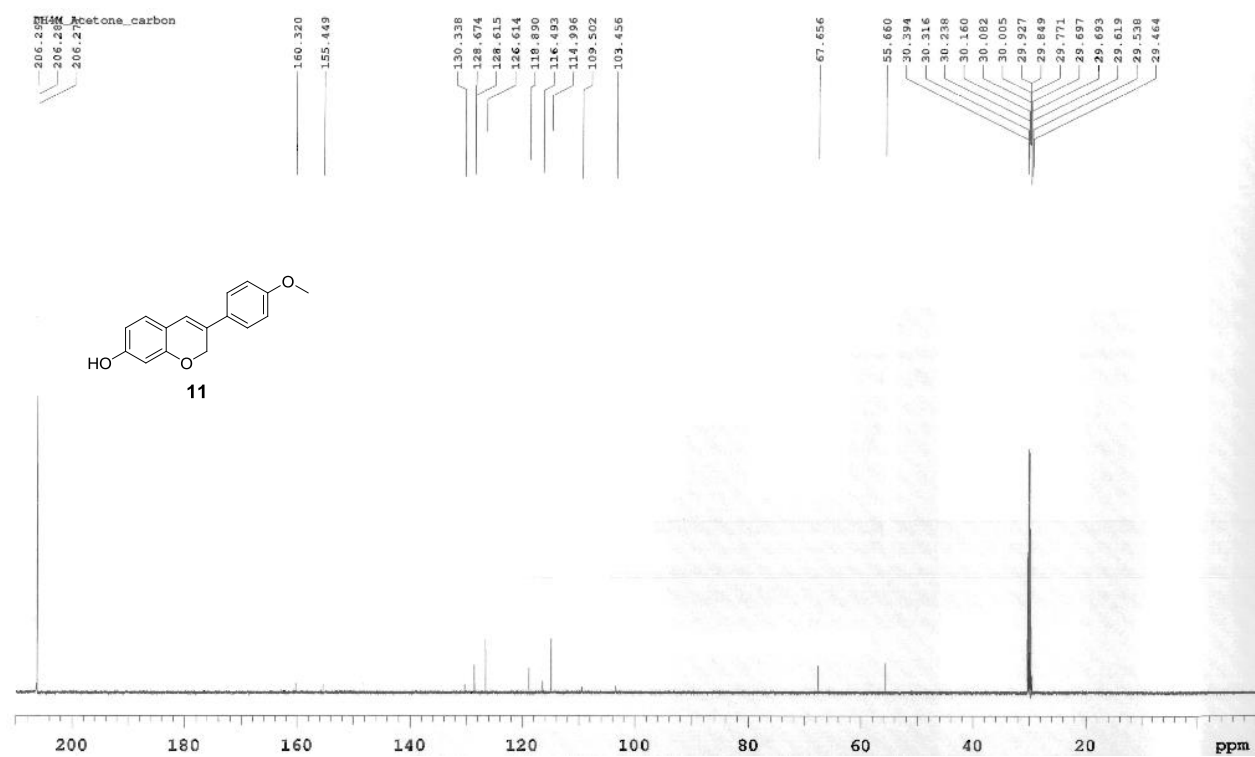

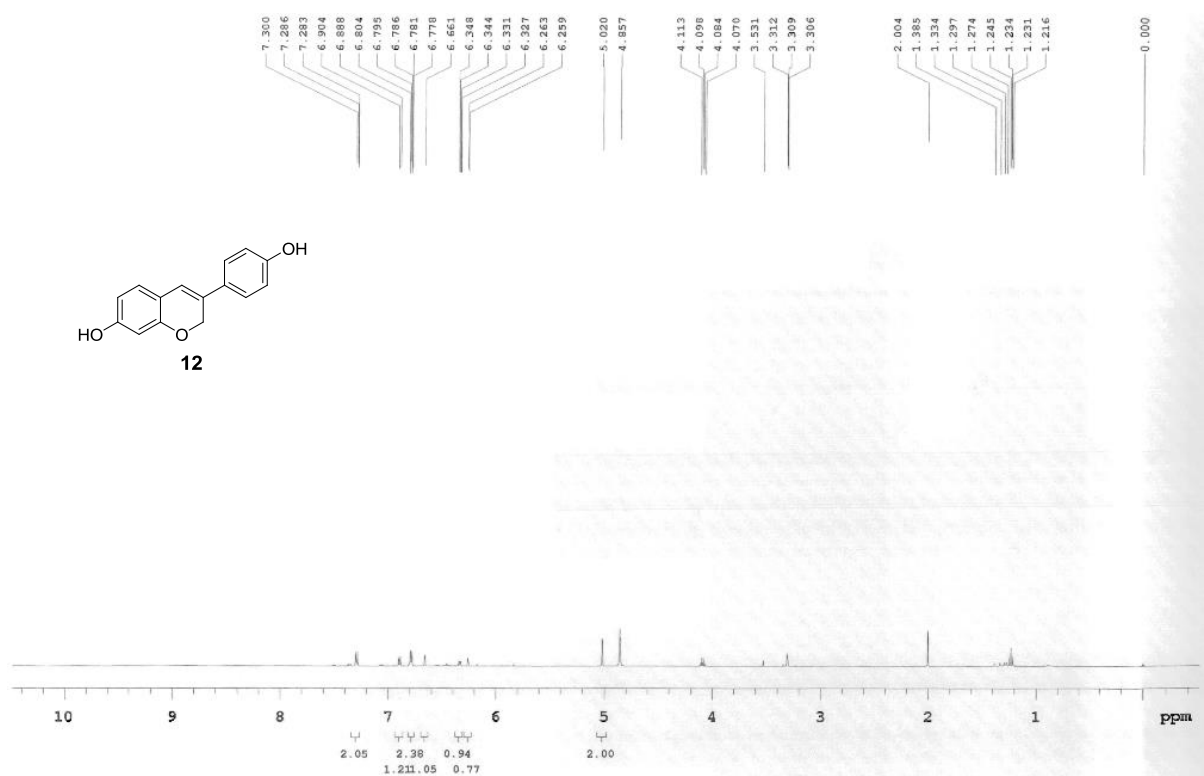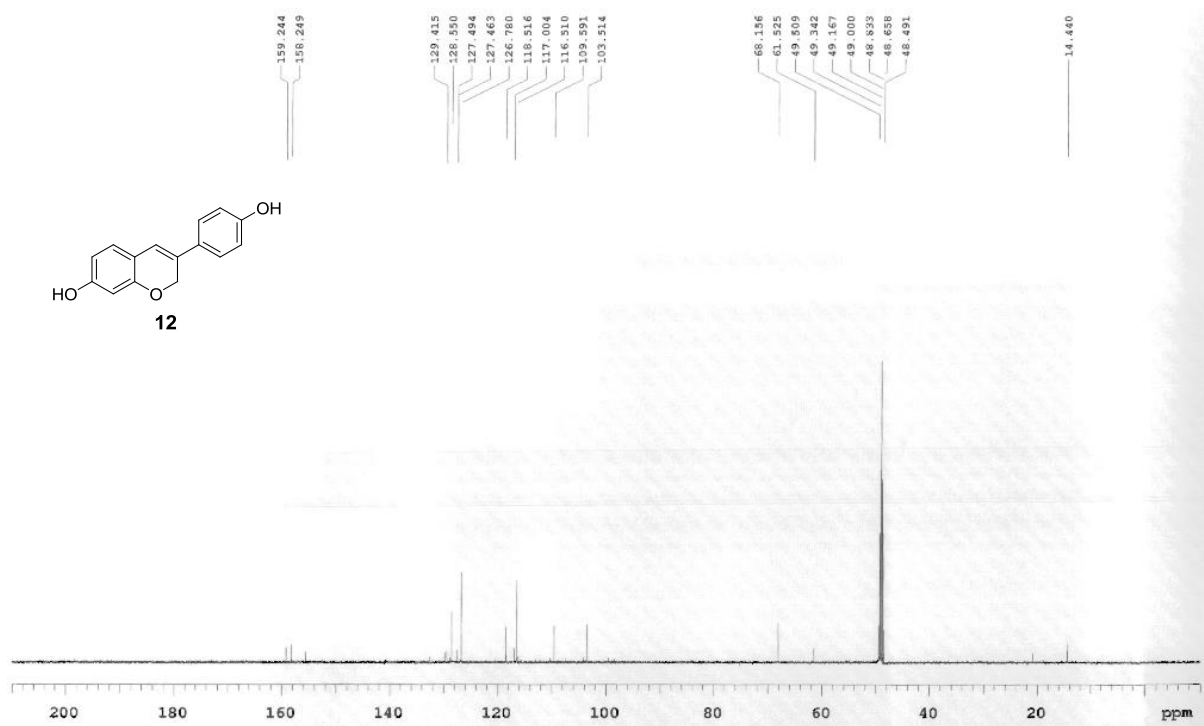

EH\_DP3H  
H<sub>2</sub>O  
File: Proton  
Pulse Sequence: zgpg30

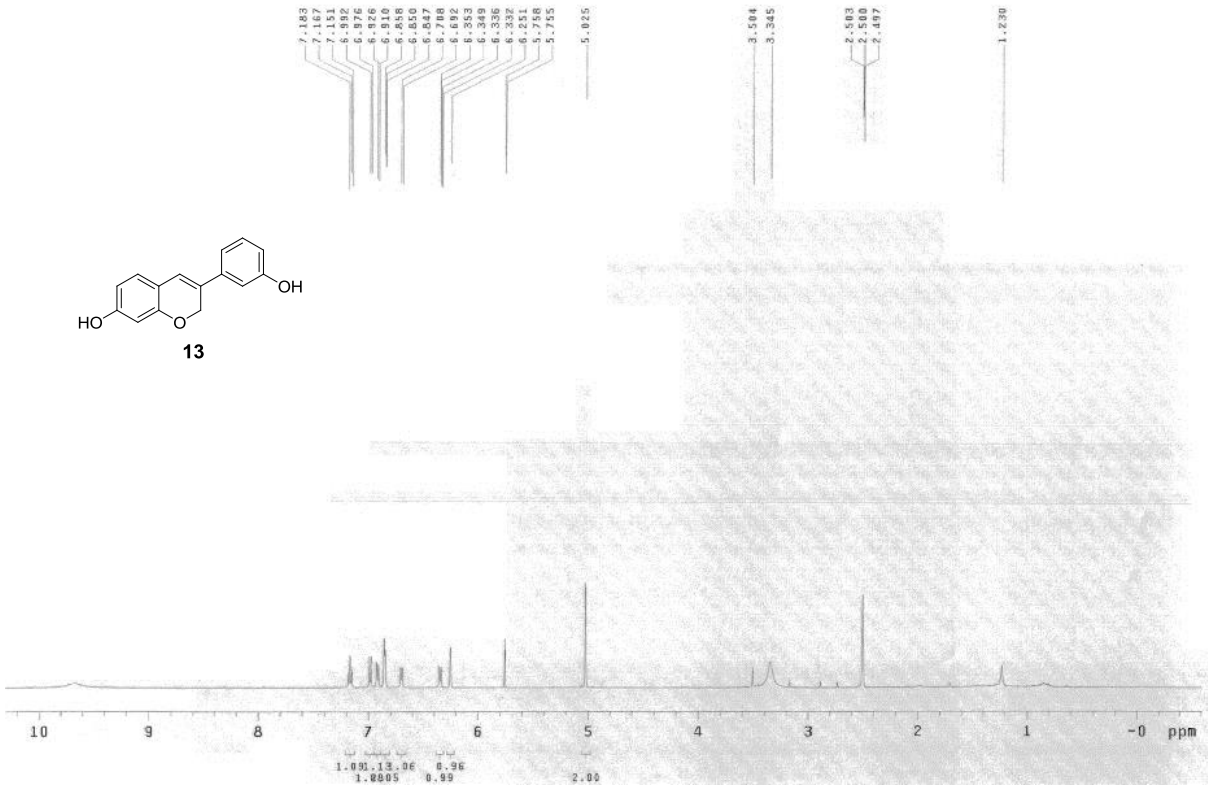

EH\_DP3H\_C\_DMSO

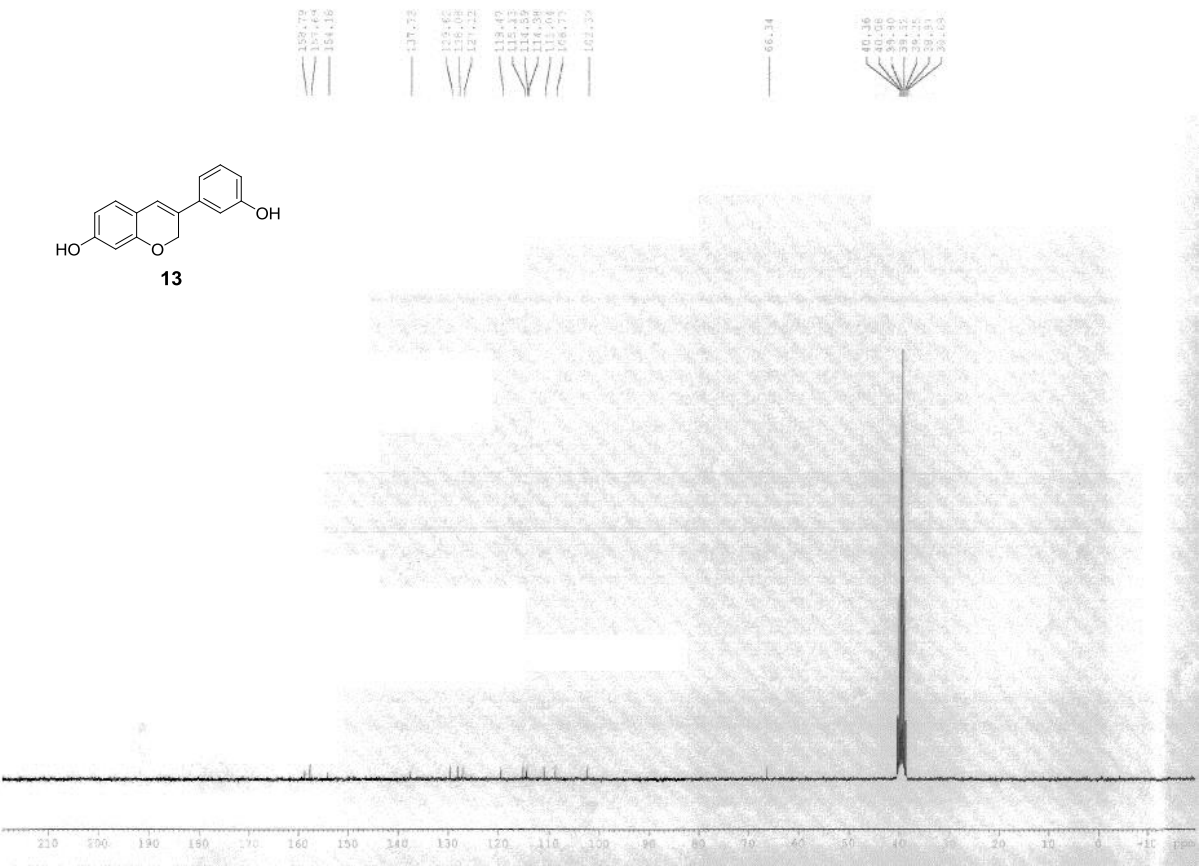

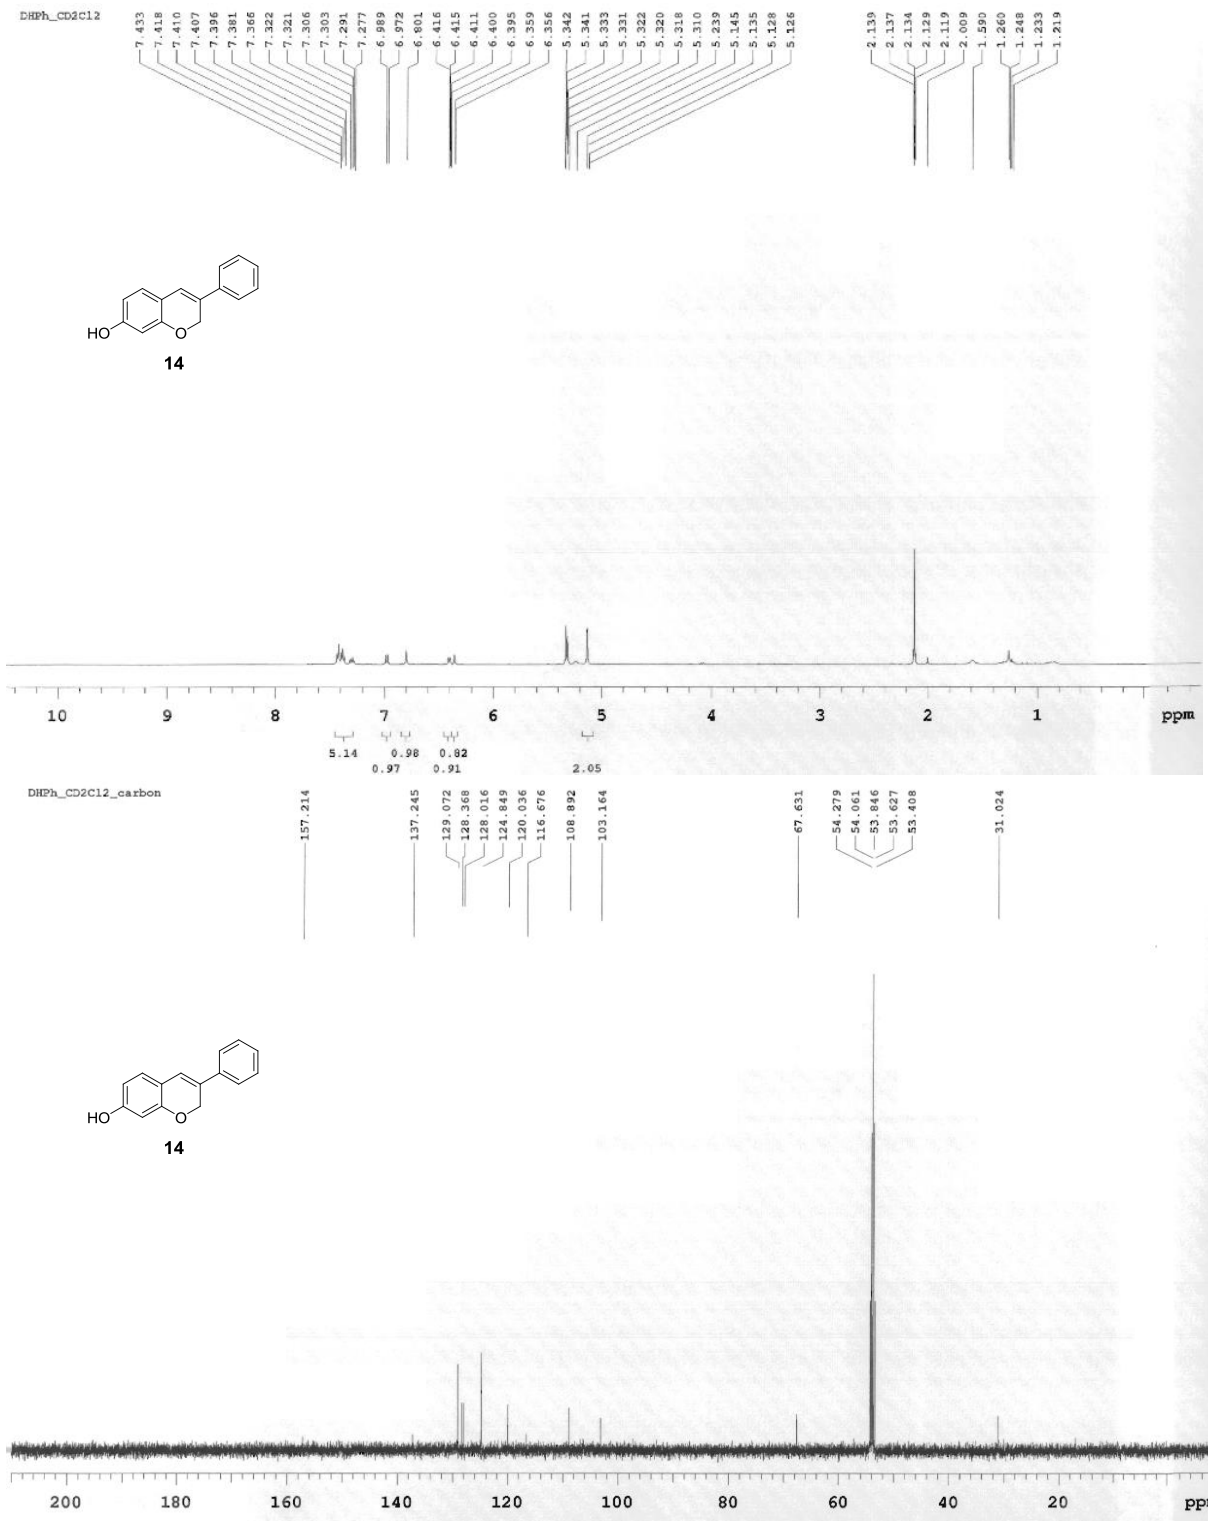

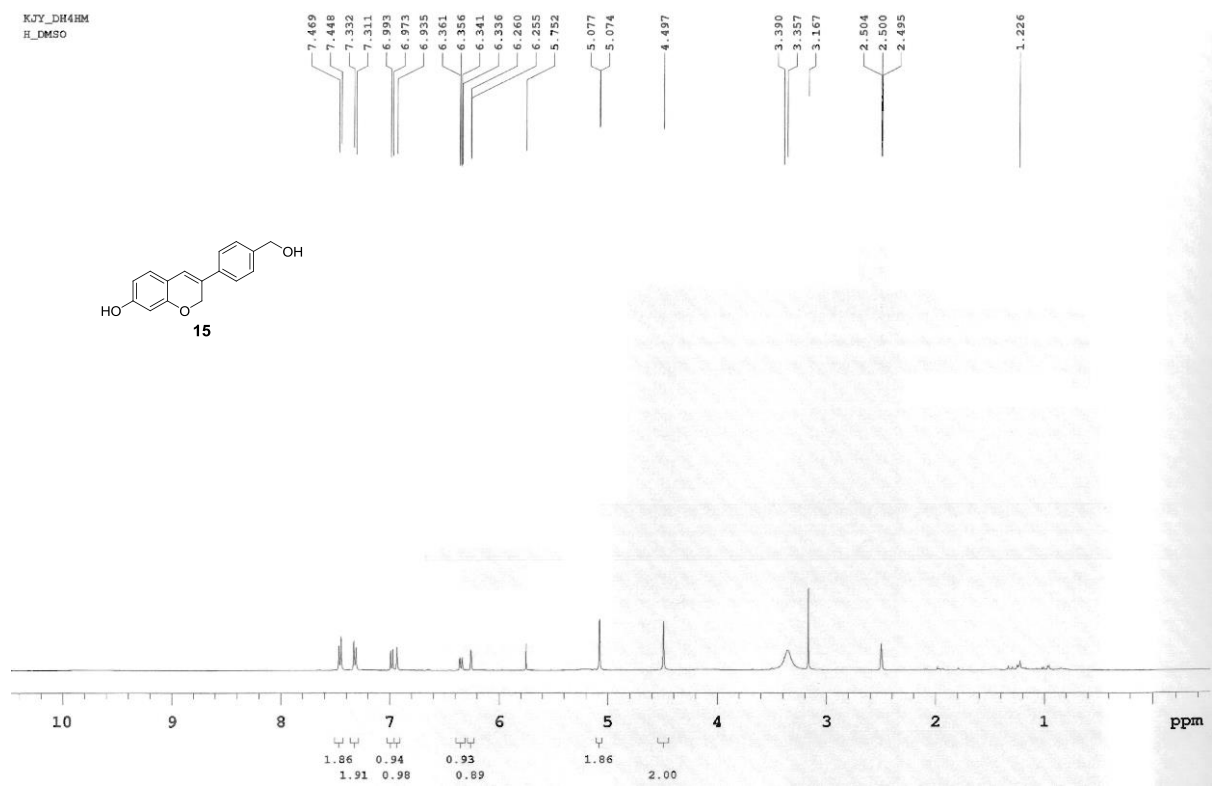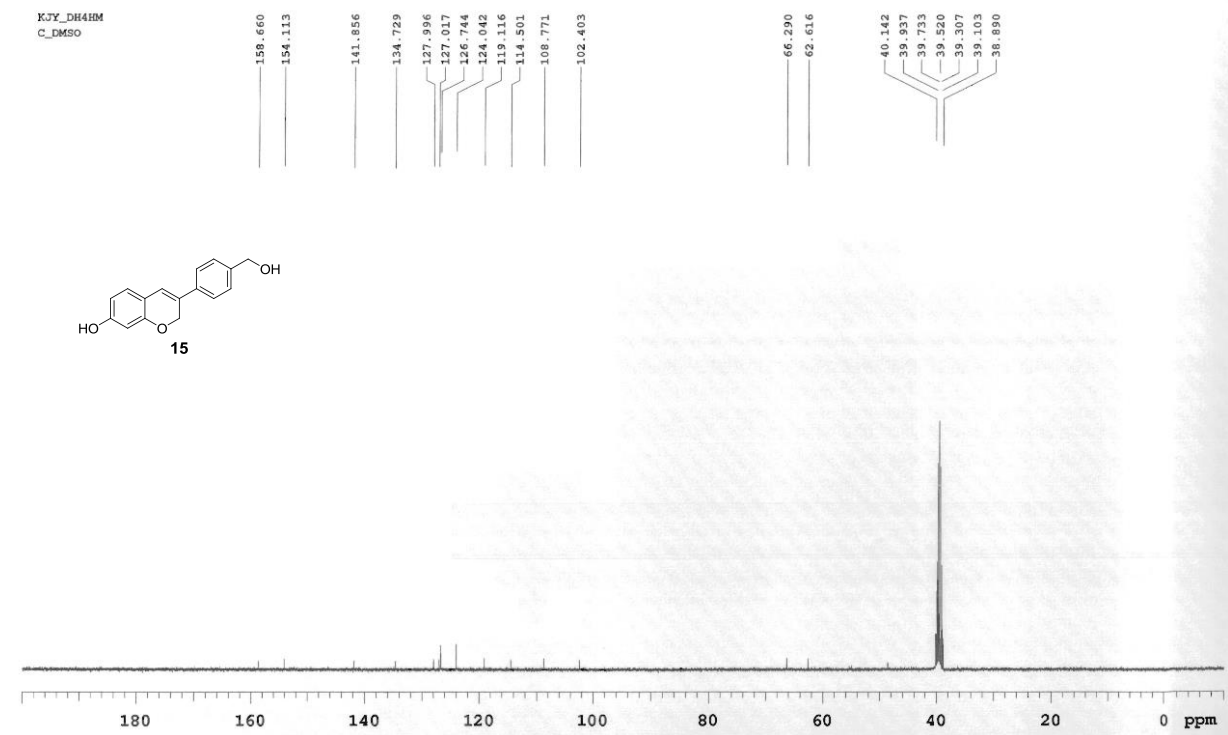

EH\_DM2M  
H<sub>2</sub>OCDCl<sub>3</sub>

File: Proton

Pulse Sequence: s2pu1

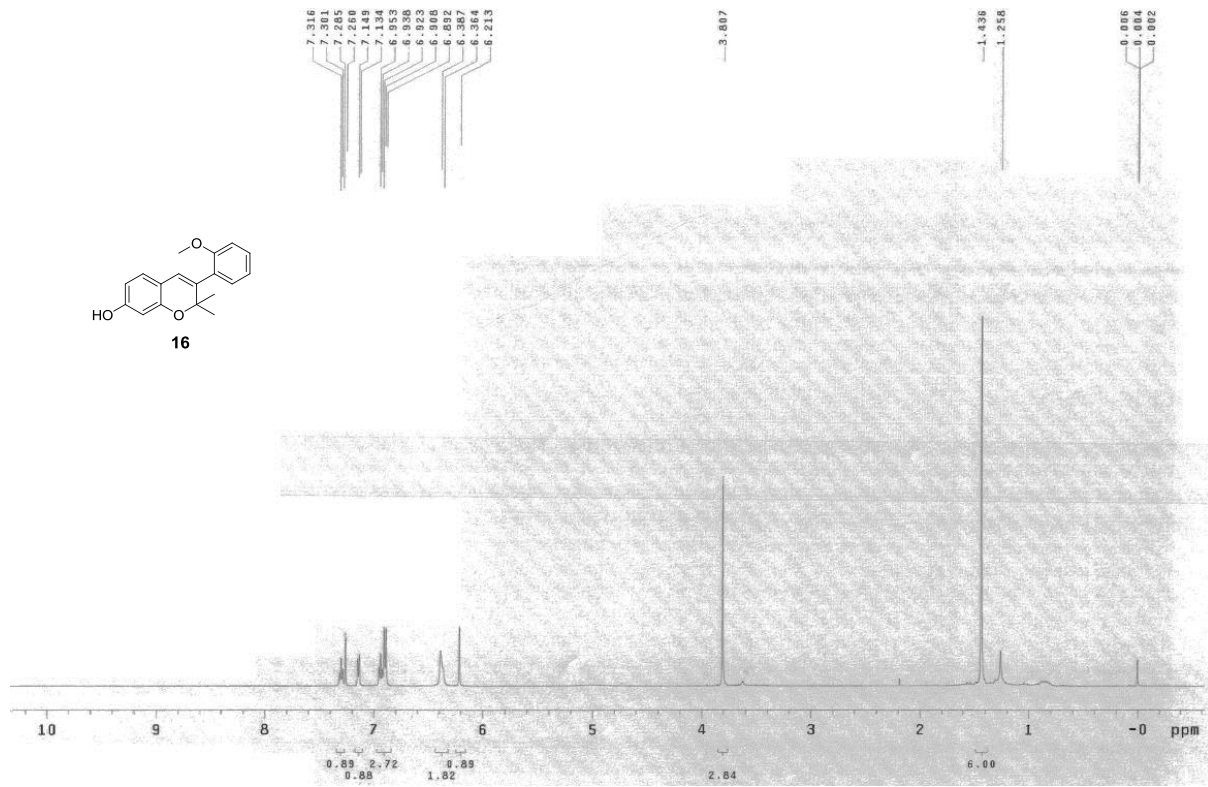

EH\_DM2M\_C\_CDCl<sub>3</sub>

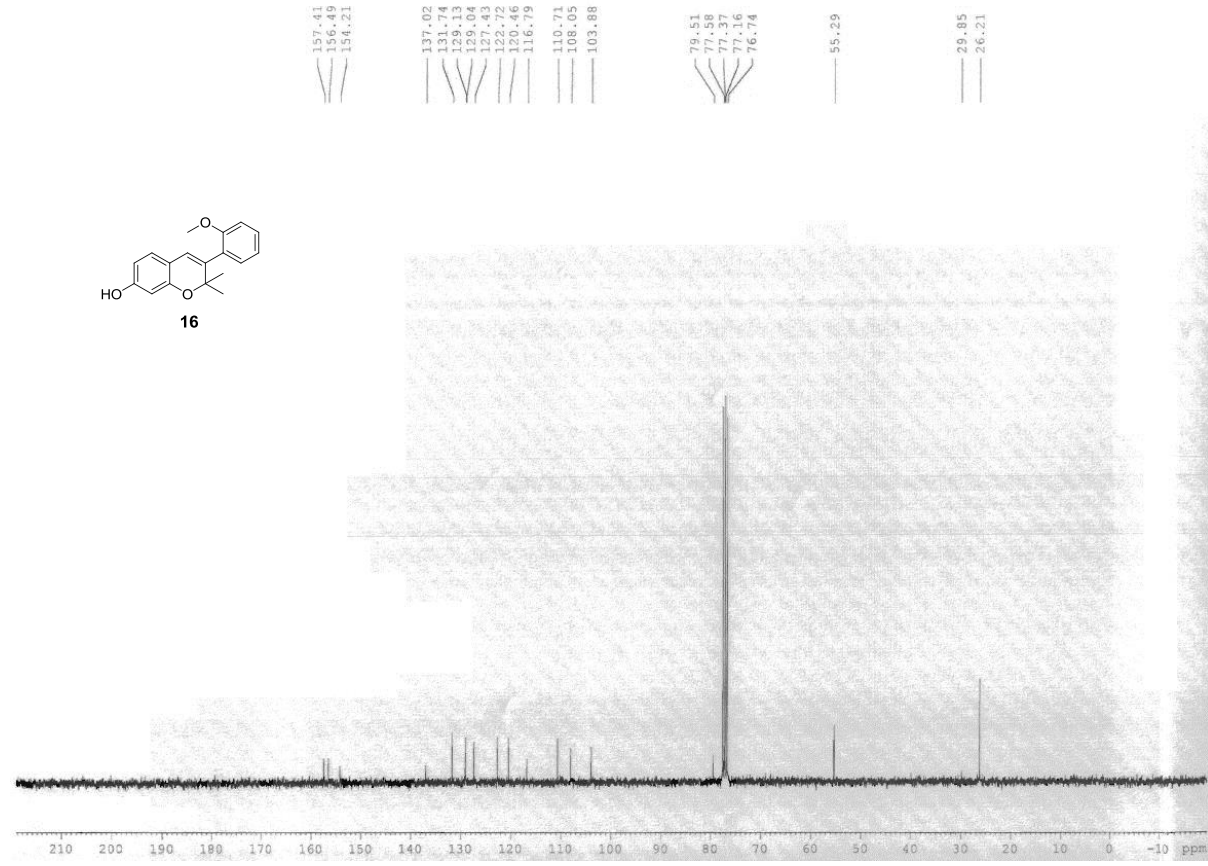

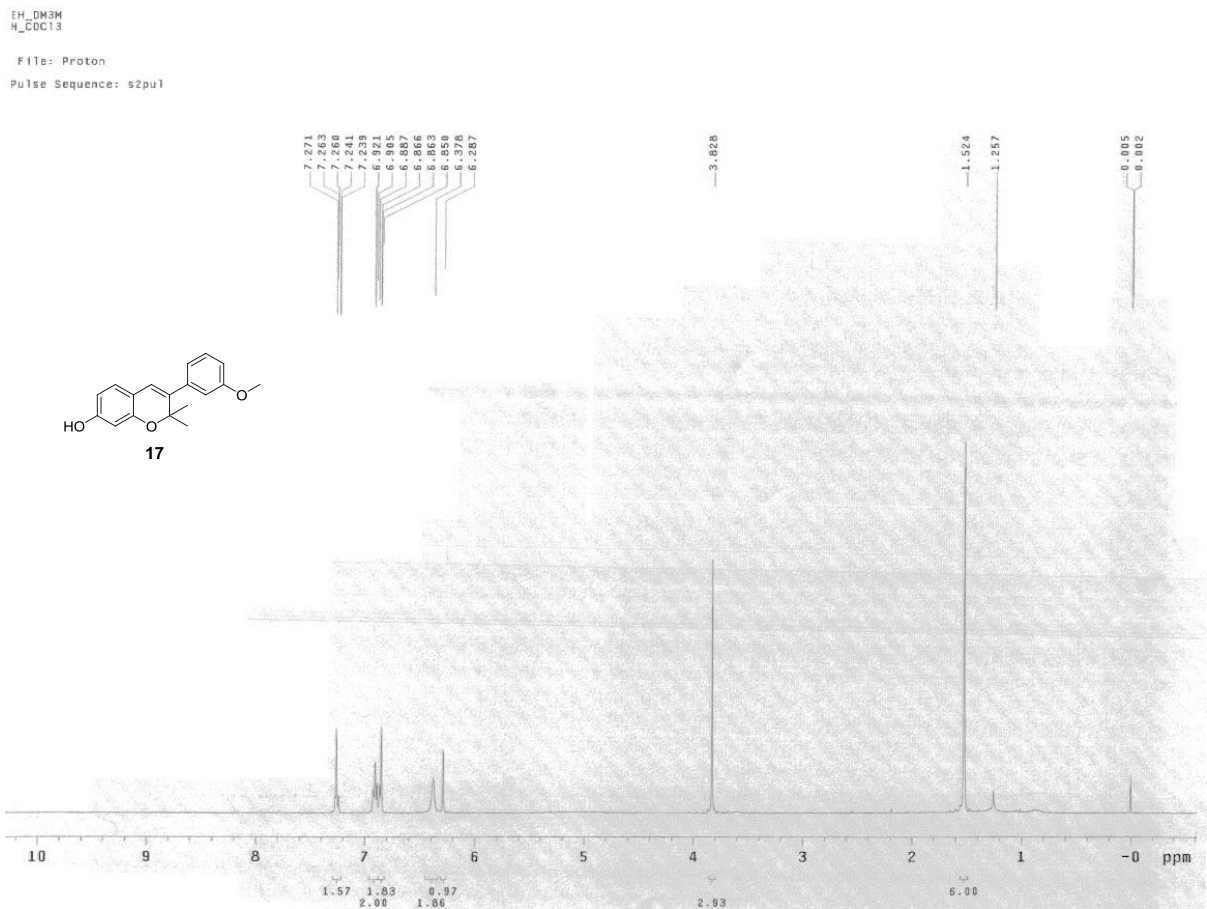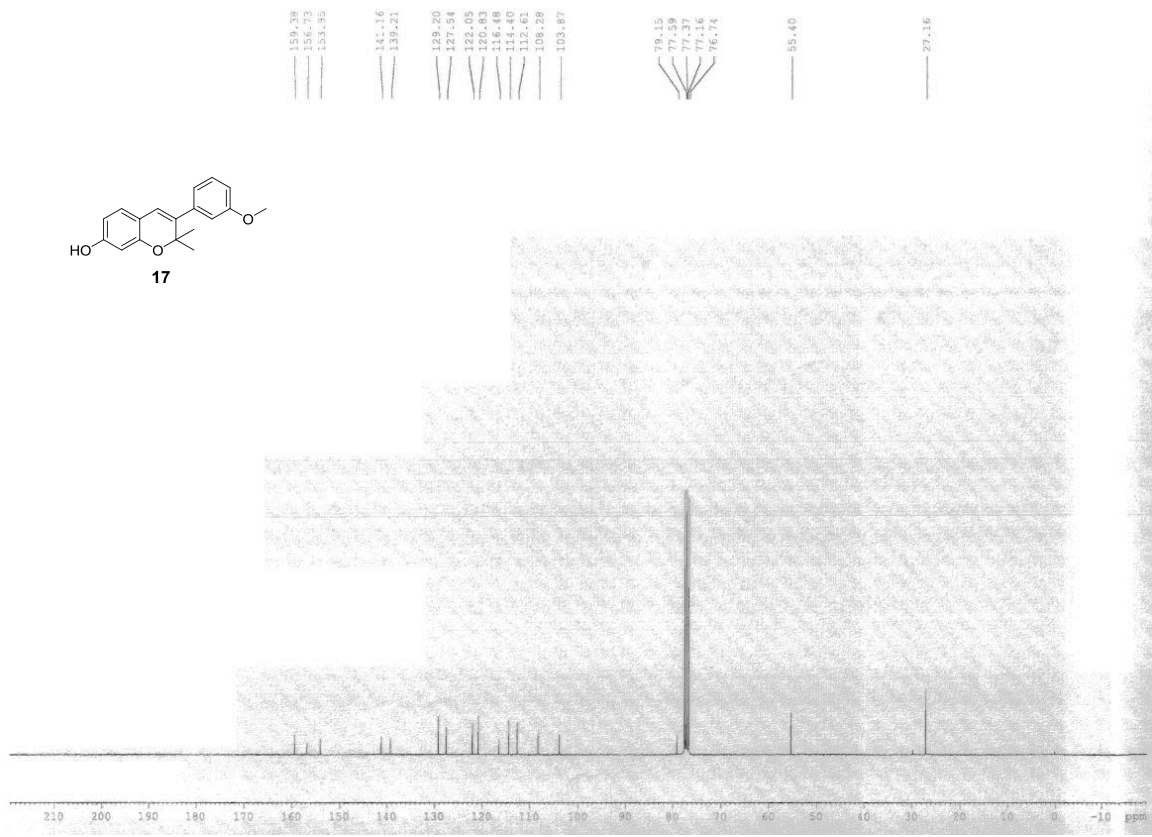

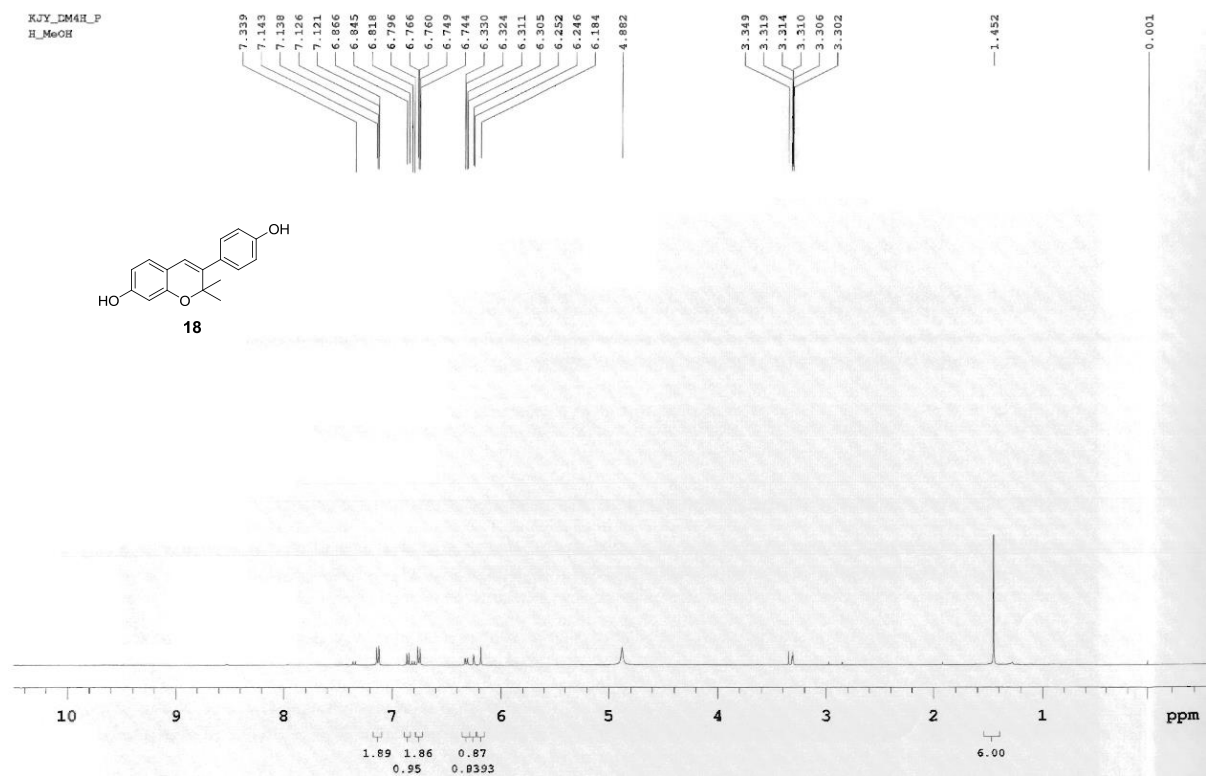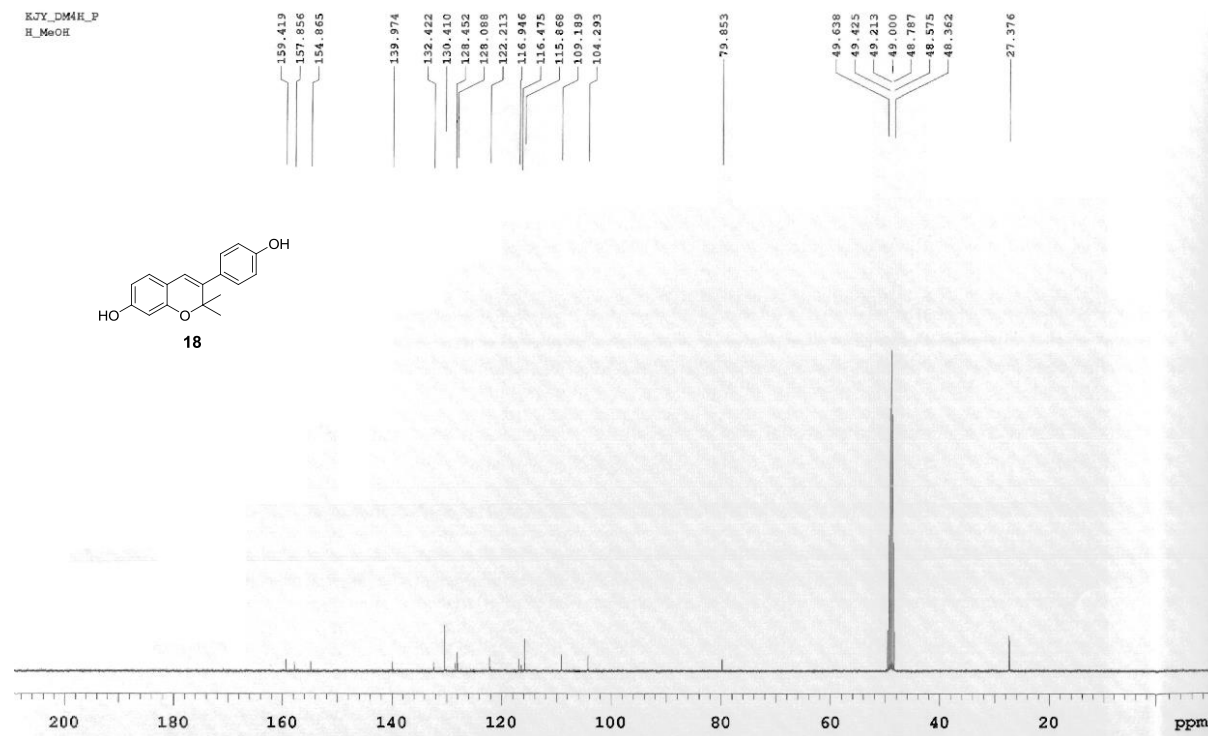

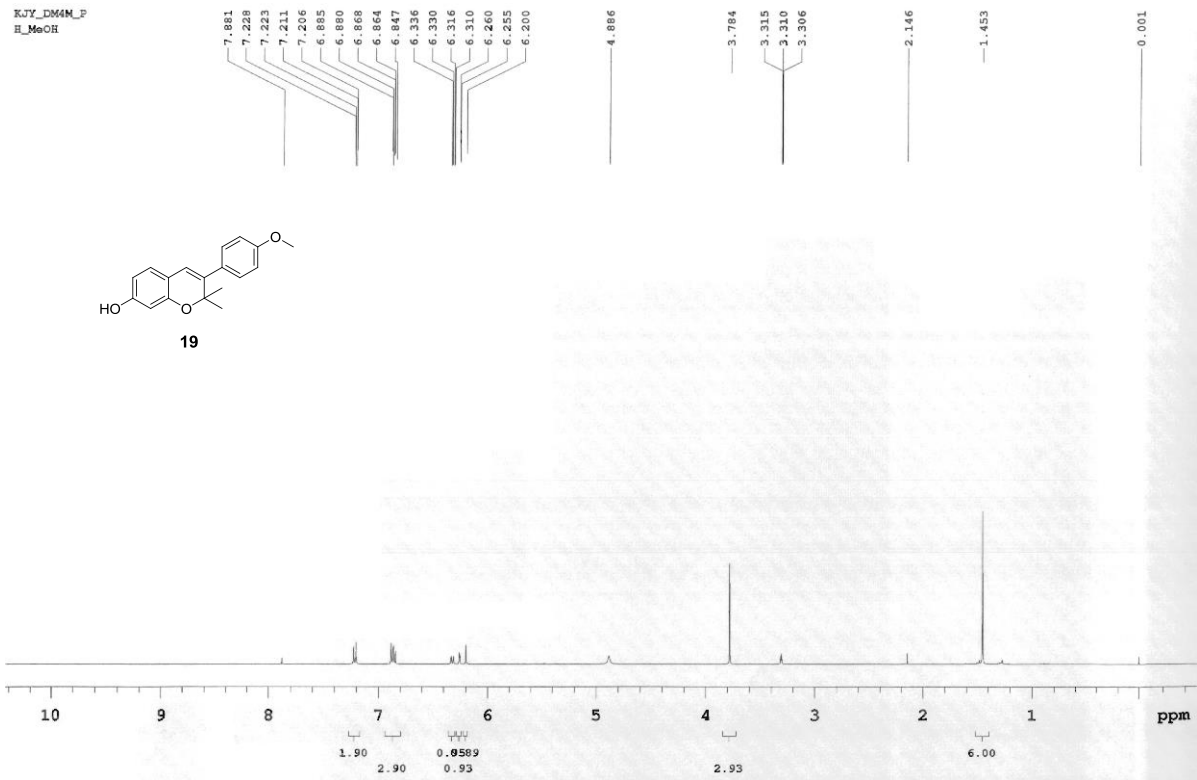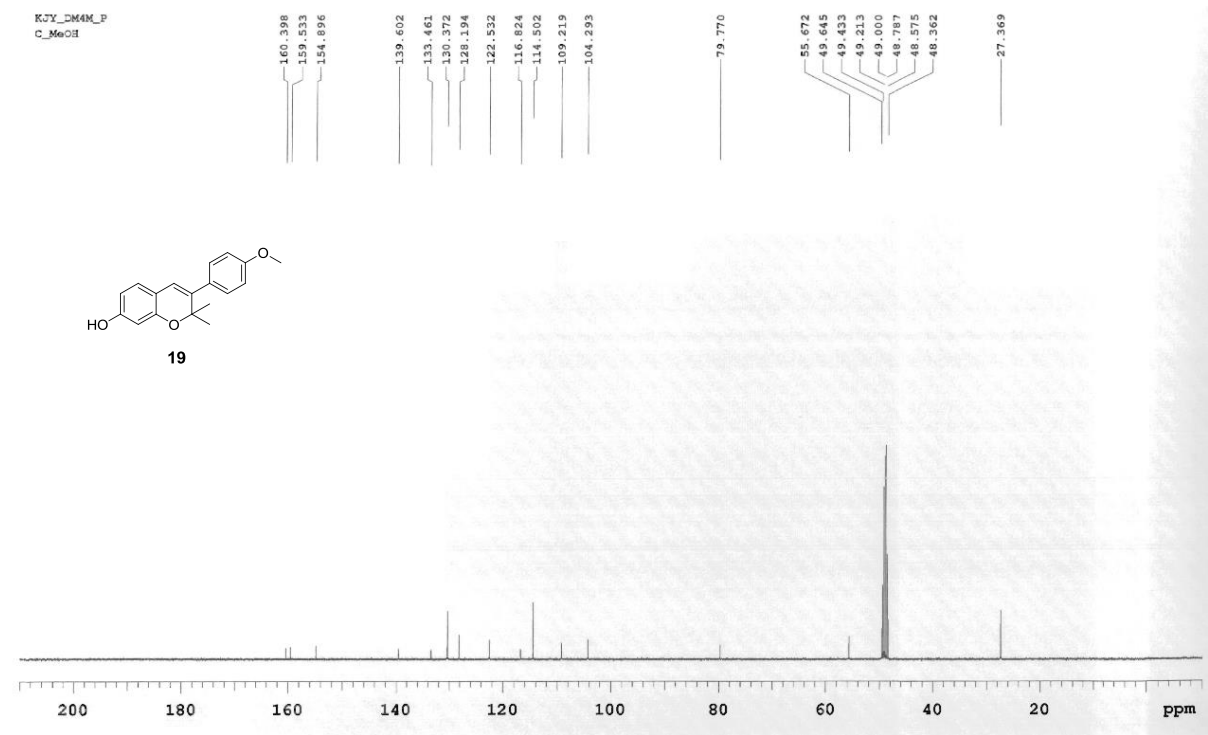

Supplement: c3ob41264d.pdf [file c3ob41264d.pdf]
